# Supplementary material
Source: MDPI journal article supplement (https://www.mdpi.com/1424-8247/15/9/1098)
Supplement: s1 [file s1]

**Synthesis and Evaluation of Antiproliferative Activity,  
Topoisomerase II $\alpha$  Inhibition, DNA Binding and Non-Clinical Toxicity of New  
Acridine–Thiosemicarbazone Derivatives.**

**Gleyton Sousa <sup>1,2</sup>, Maria C. F. de Almeida <sup>3</sup>, Lucas L. Lócio <sup>3</sup>, Vanda L. dos Santos <sup>3</sup>,  
Daniel P. Bezerra <sup>4</sup>, Valdenizia R. Silva <sup>4</sup>, Sinara M. V. de Almeida <sup>5</sup>, Alice Simon <sup>6</sup>,  
Thiago da S. Honório <sup>6</sup>, Lucio M. Cabral <sup>6</sup>, Rosane N. Castro <sup>1</sup>, Ricardo O. de Moura  
<sup>3</sup> and Arthur E. Kümmerle <sup>1,\*</sup>**

<sup>1</sup> Institute of Chemistry, Federal Rural University of Rio de Janeiro, Seropédica 23897-000, Brazil

<sup>2</sup> Department of Chemistry, State University of Paraíba, Campina Grande 58429-500, Brazil

<sup>3</sup> Department of Biological Sciences, State University of Paraíba, Campina Grande 58429-500, Brazil

<sup>4</sup> Laboratory of Tissue Engineering and Immunopharmacology (LETI), Institute Gonçalo Moniz (IGM), Foundation Oswaldo Cruz (Fiocruz), Salvador 40296-710, Brazil

<sup>5</sup> Molecular Biology Laboratory, University of Pernambuco (UPE), Garanhuns 55290-000, Brazil

<sup>6</sup> Department of Drugs and Pharmaceutics, Faculty of Pharmacy, Universidade Federal do Rio de Janeiro, Av. Carlos Chagas Filho, 373, CCS, Bss, Rio de Janeiro 21941-902, Brazil

\* Correspondence: akummerle@hotmail.com; Tel.: +55-21-998576298

## SUPPLEMENTARY MATERIAL

### (E)-N-(acridin-9-yl)-2-benzylidenehydrazine-1-carbothioamide (**CL-01**)

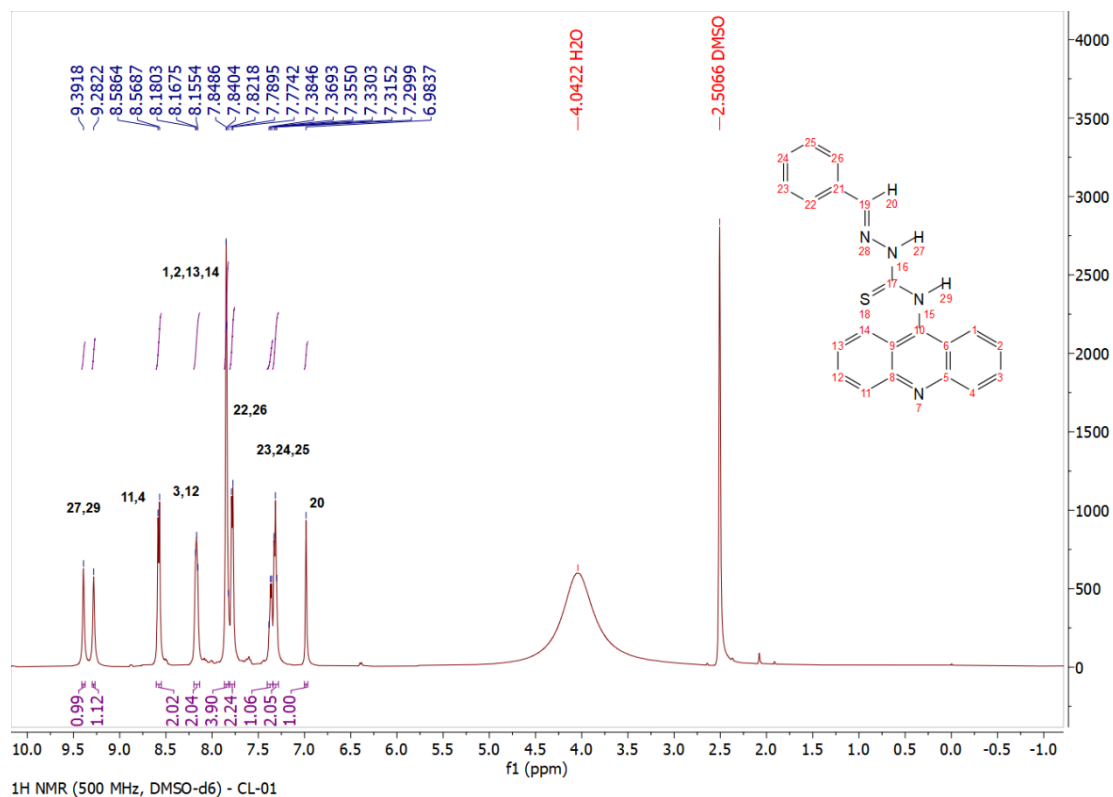

**Figure S1.** <sup>1</sup>H NMR spectrum of **CL-01**.

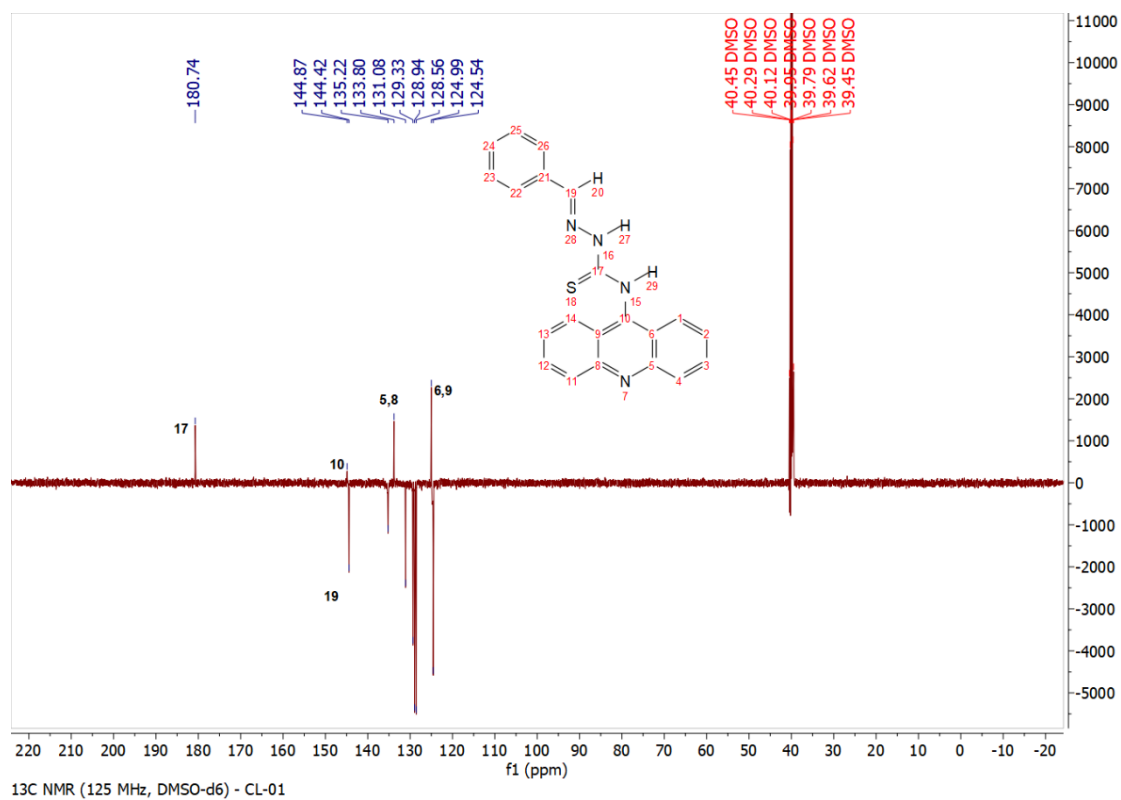

**Figure S2.** <sup>13</sup>C NMR spectrum of **CL-01**.

(E)-N-(acridin-9-yl)-2-(4-chlorobenzylidene)hydrazine-1-carbothioamide (**CL-02**)

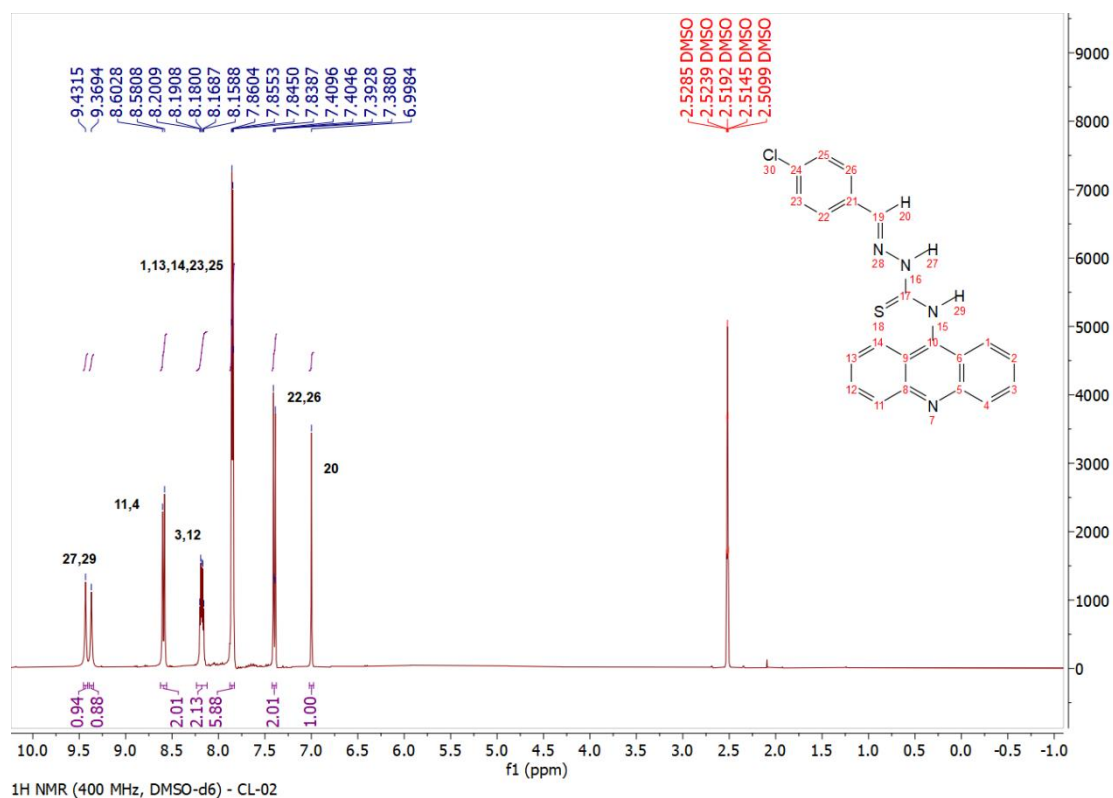

**Figure S3.** <sup>1</sup>H NMR spectrum of **CL-02**.

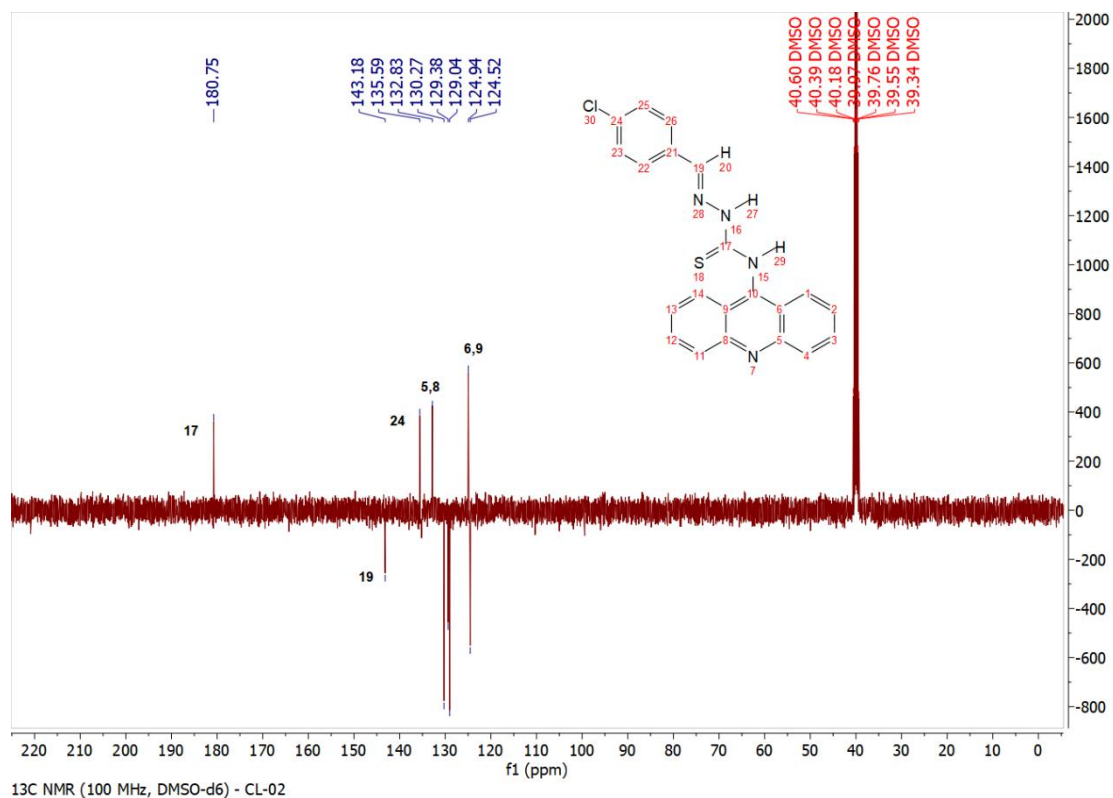

**Figure S4.** <sup>13</sup>C NMR spectrum of **CL-02**.

(E)-N-(acridin-9-yl)-2-(4-methoxybenzylidene)hydrazine-1-carbothioamide (**CL-03**)

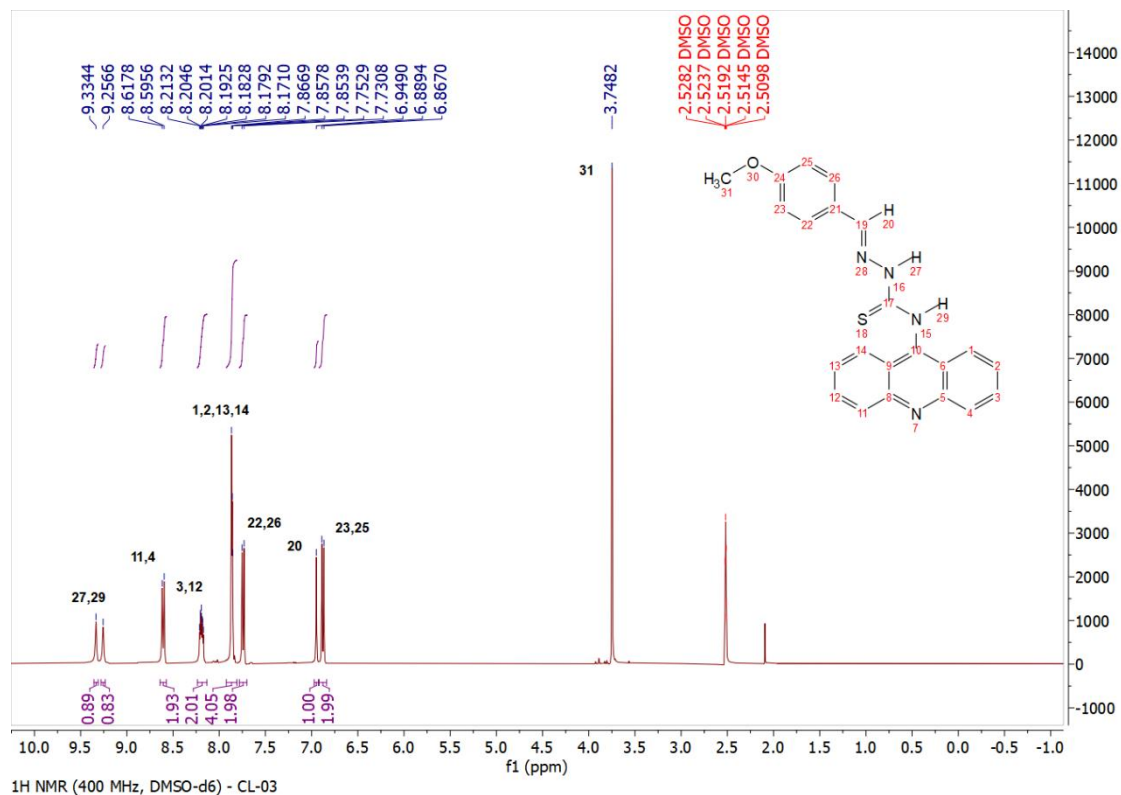

**Figure S5.** <sup>1</sup>H NMR spectrum of **CL-03**.

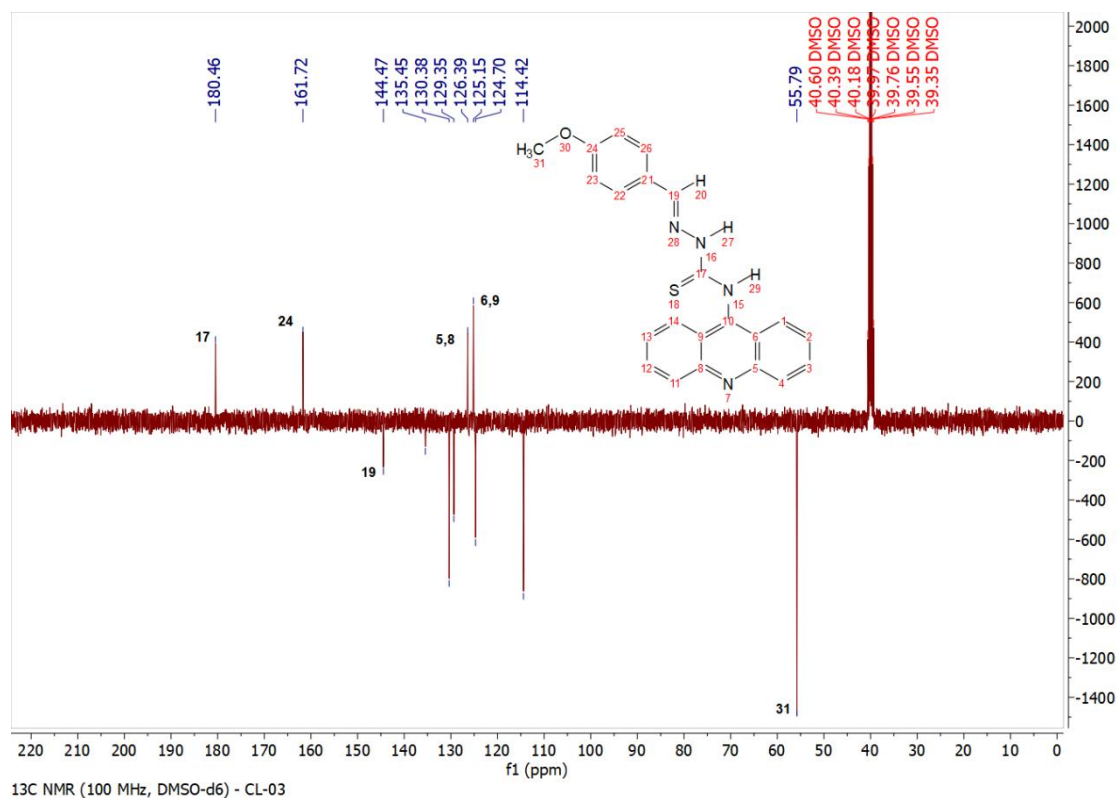

**Figure S6.** <sup>13</sup>C NMR spectrum of **CL-03**.

(E)-N-(acridin-9-yl)-2-(2,4-dichlorobenzylidene)hydrazine-1-carbothioamide (**CL-04**)

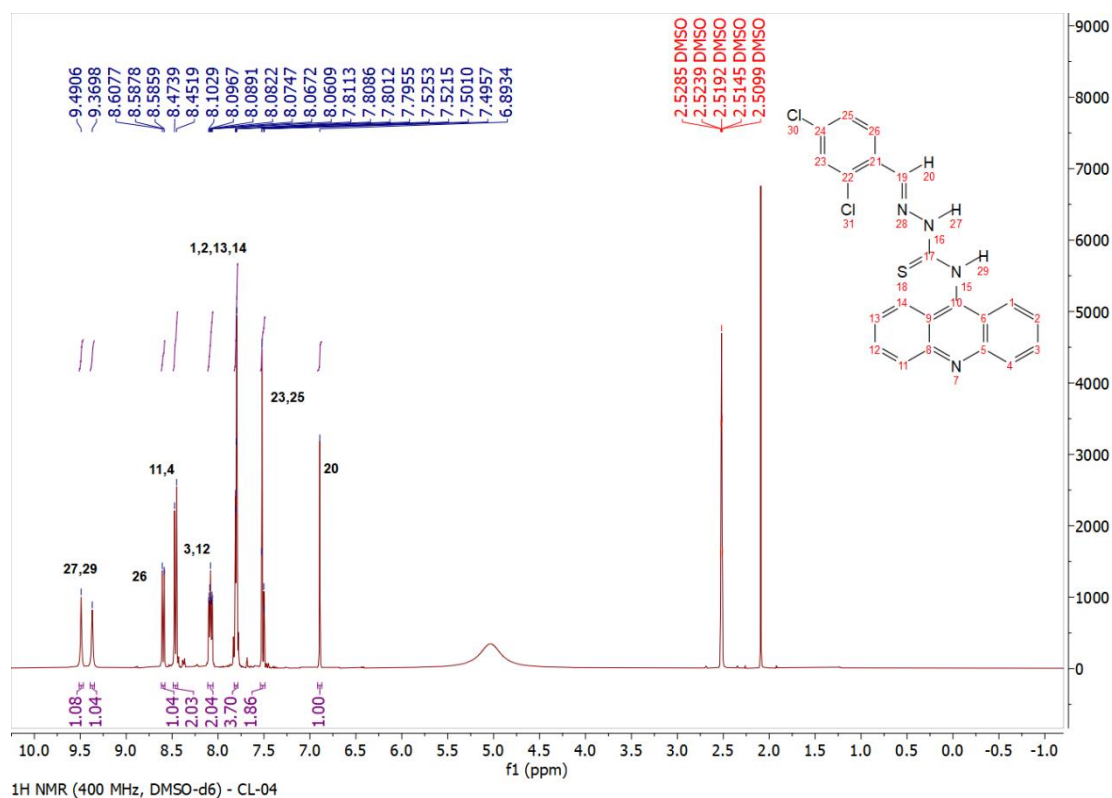

Figure S7. <sup>1</sup>H NMR spectrum of **CL-04**.

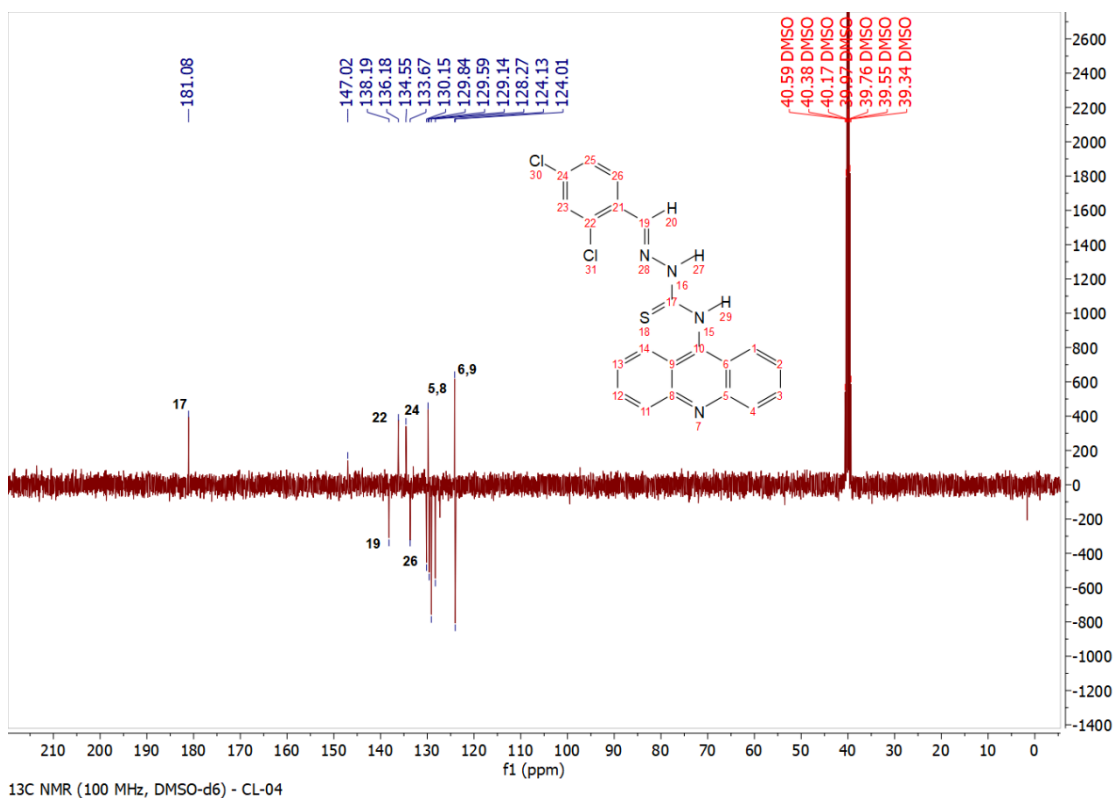

Figure S8. <sup>13</sup>C NMR spectrum of **CL-04**.

(E)-N-(acridin-9-yl)-2-(4-nitrobenzylidene)hydrazine-1-carbothioamide (**CL-05**)

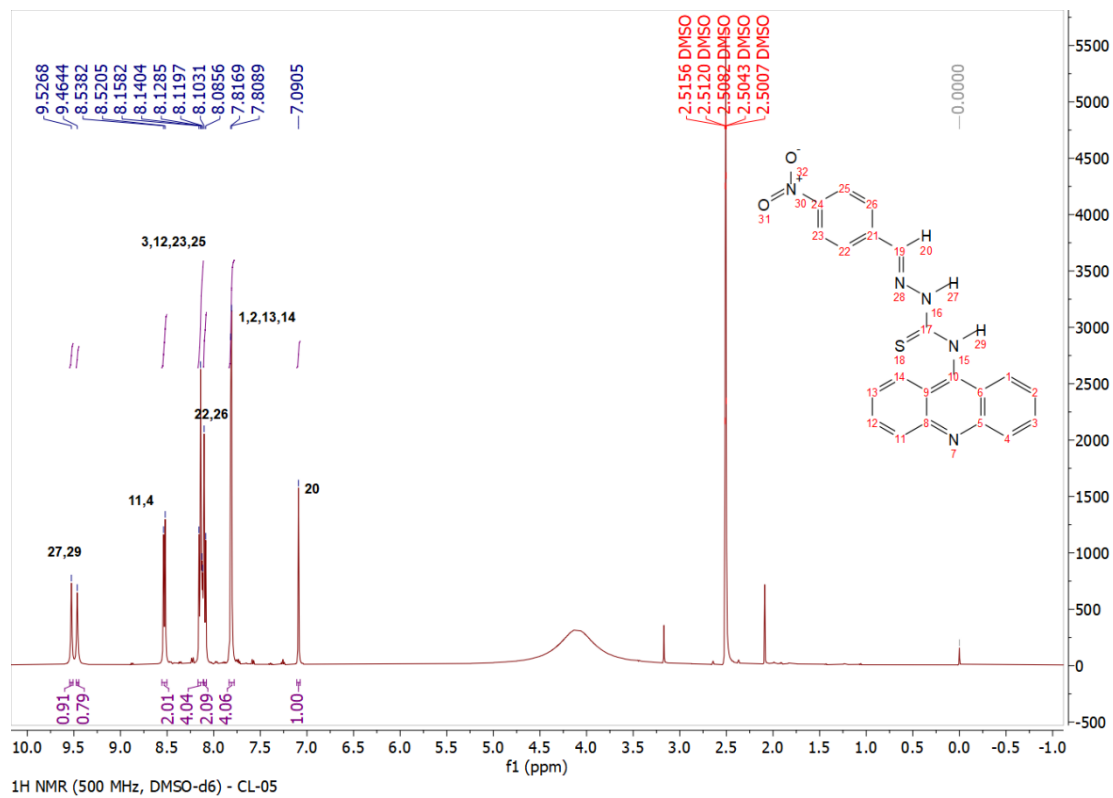

**Figure S9.** <sup>1</sup>H NMR spectrum of **CL-05**.

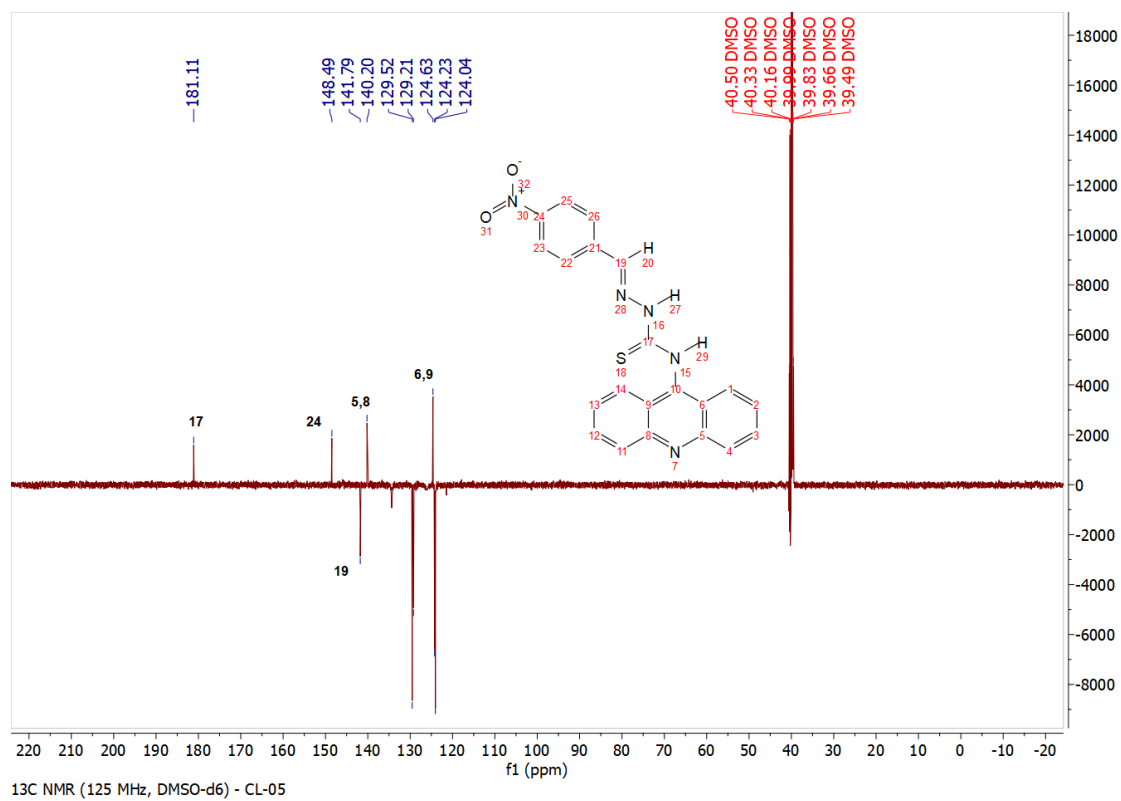

**Figure S10:** <sup>13</sup>C NMR spectrum of **CL-05**.

(E)-N-(acridin-9-yl)-2-(4-methylbenzylidene)hydrazine-1-carbothioamide (**CL-06**)

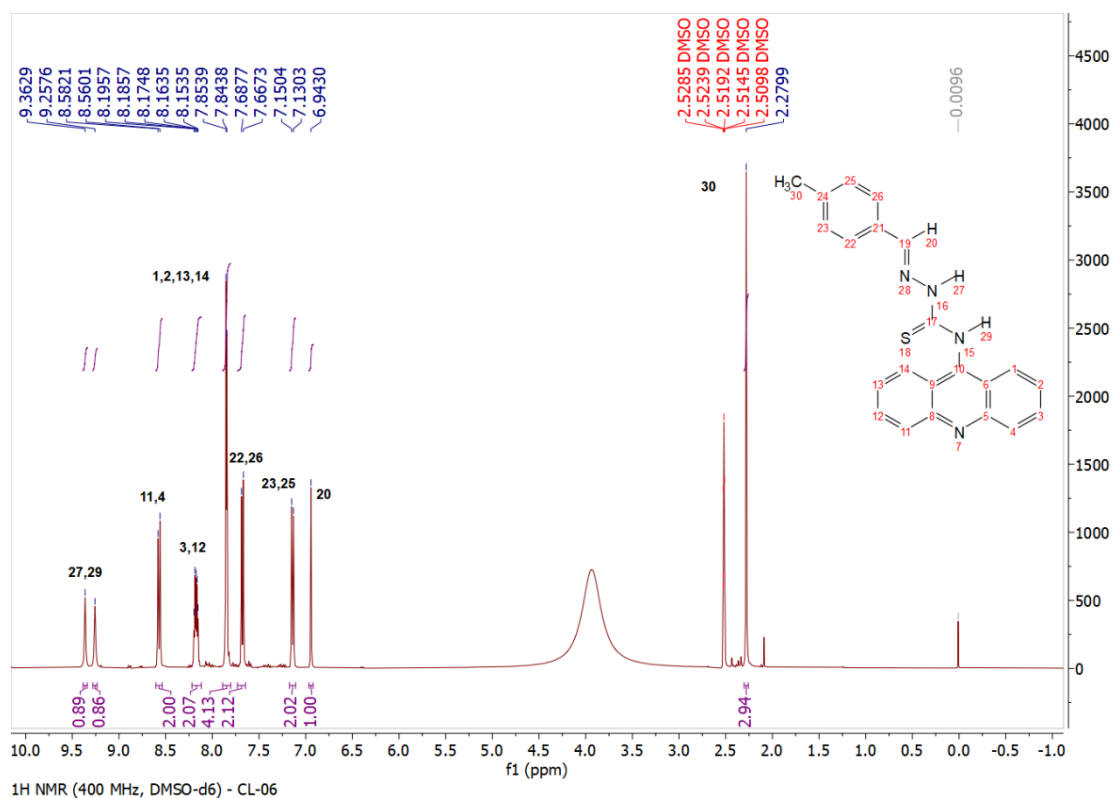

**Figure S11.** <sup>1</sup>H NMR spectrum of **CL-06**.

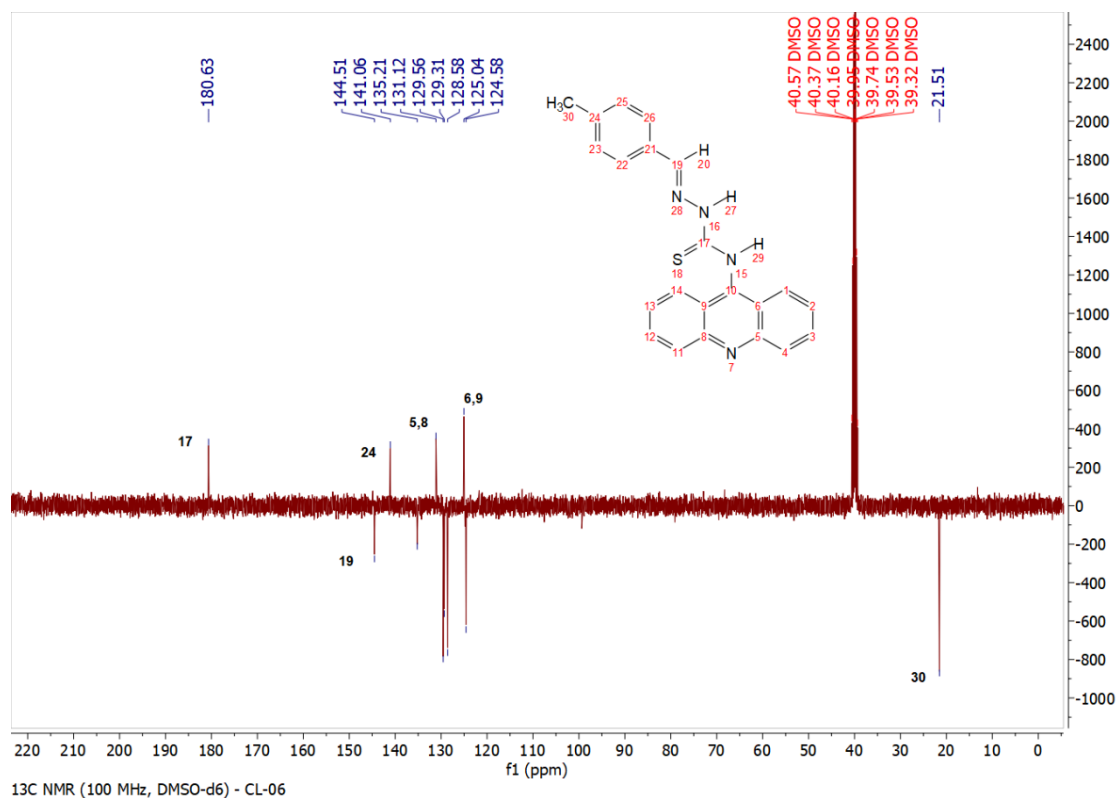

**Figure S12.** <sup>13</sup>C NMR spectrum of **CL-06**.

(E)-N-(acridin-9-yl)-2-(4-hydroxybenzylidene)hydrazine-1-carbothioamide (**CL-07**)

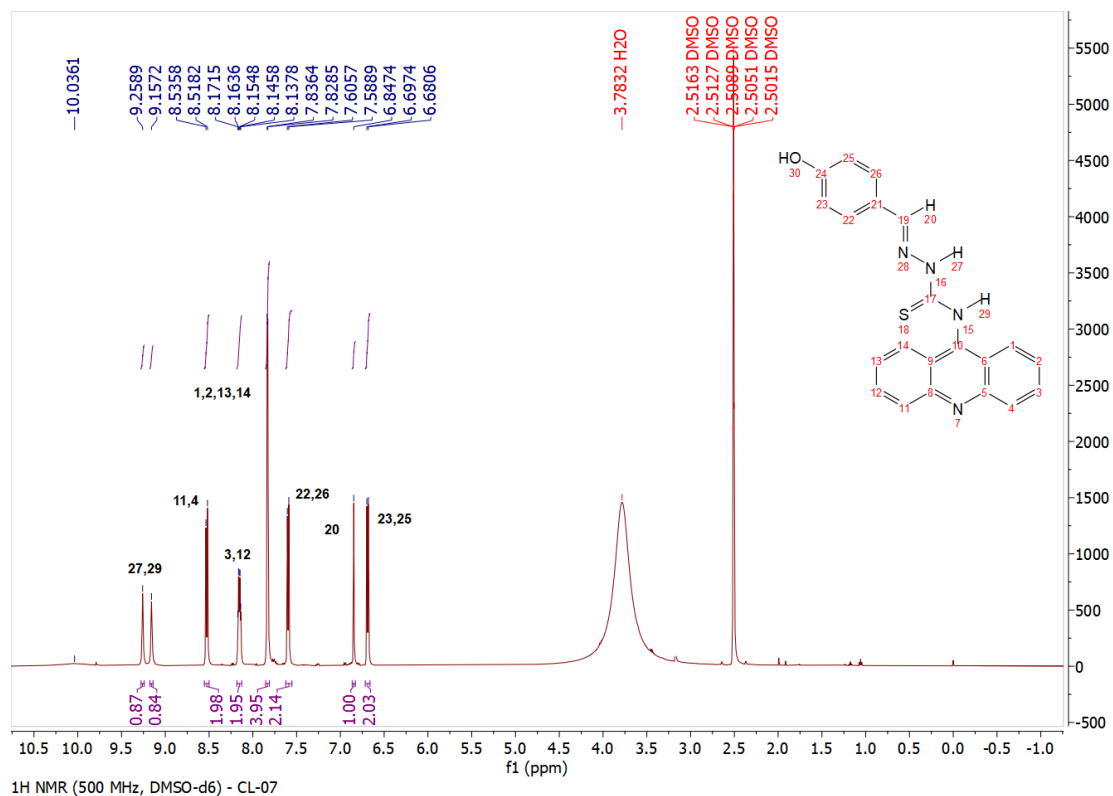

**Figure S13.** <sup>1</sup>H NMR spectrum of **CL-07**.

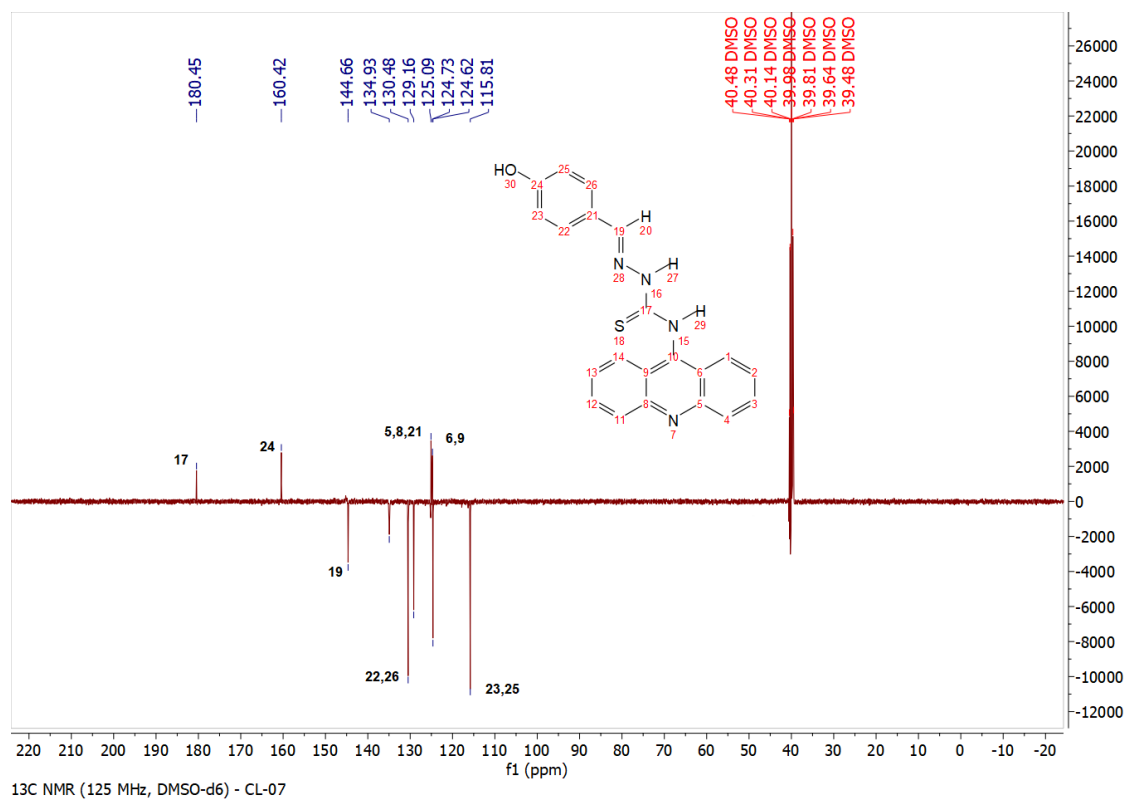

**Figure S14.** <sup>13</sup>C NMR spectrum of **CL-07**.



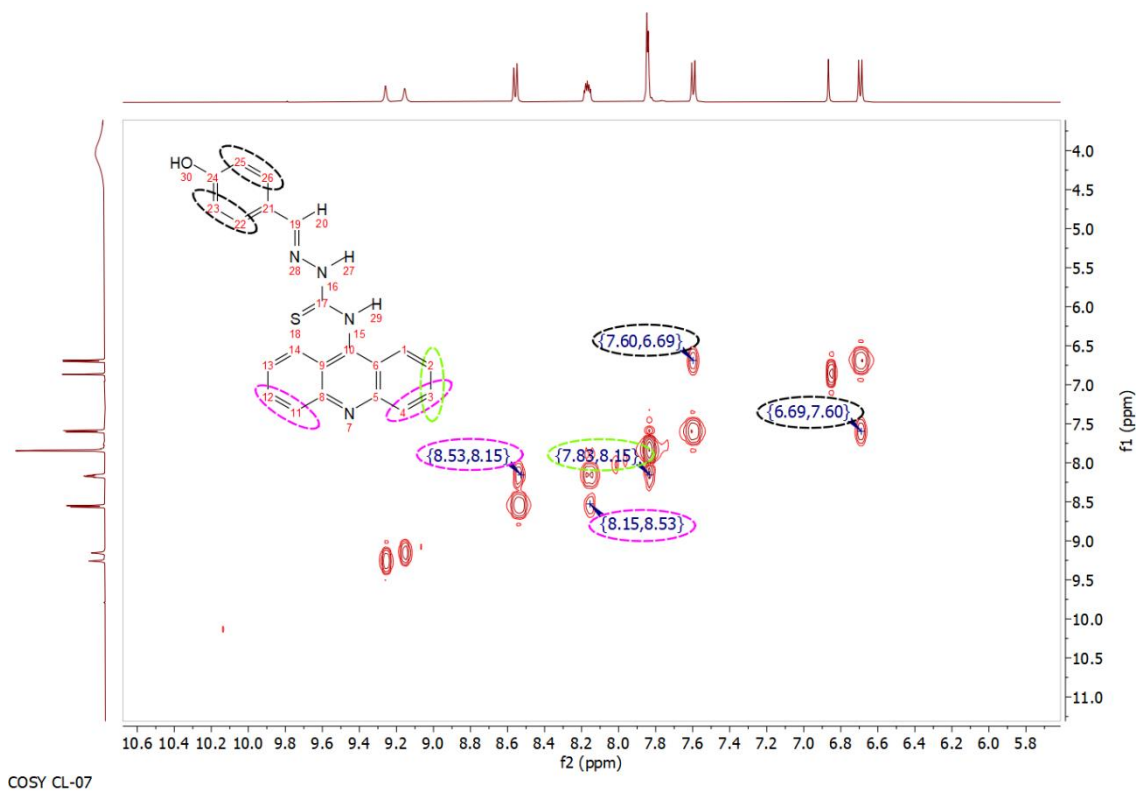

**Figure S15.** COSY spectrum of **CL-07** (Solvent: DMSO).

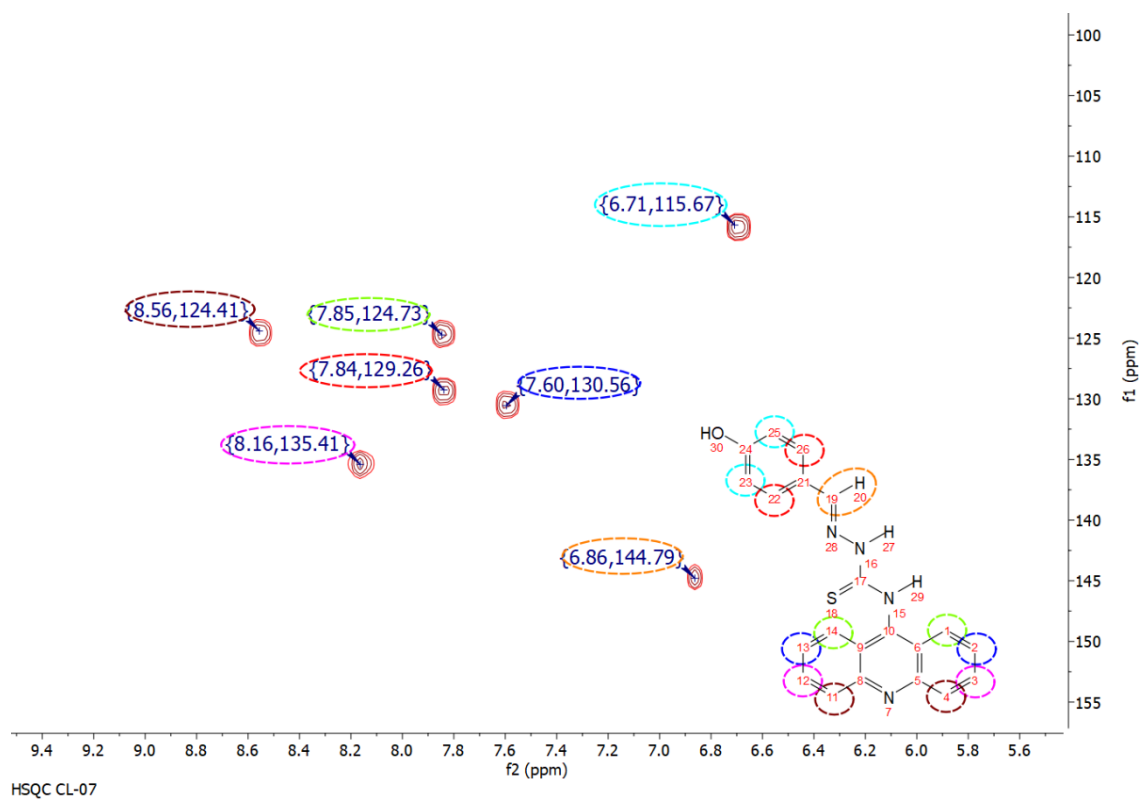

**Figure S16.** HSQC spectrum of **CL-07** (Solvent: DMSO).

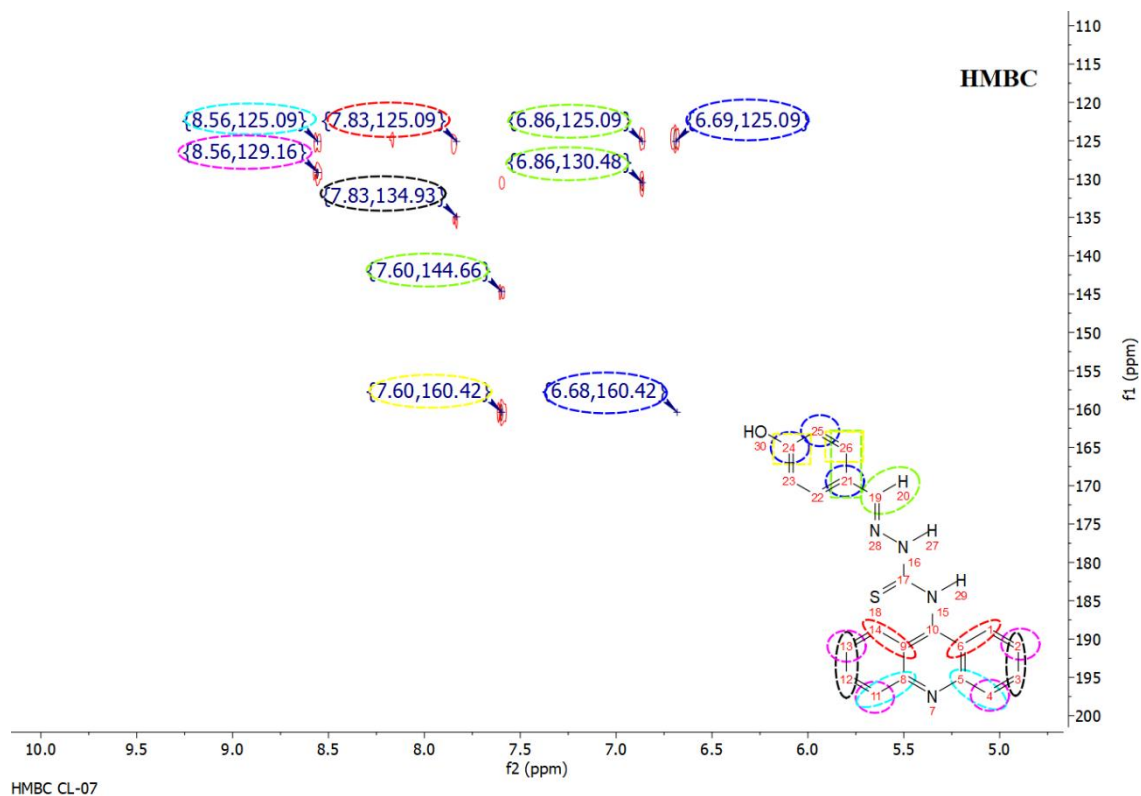

**Figure S17.** HMBC spectrum of **CL-07** (Solvent: DMSO).

(E)-N-(acridin-9-yl)-2-(3-hydroxybenzylidene)hydrazine-1-carbothioamide (**CL-08**)

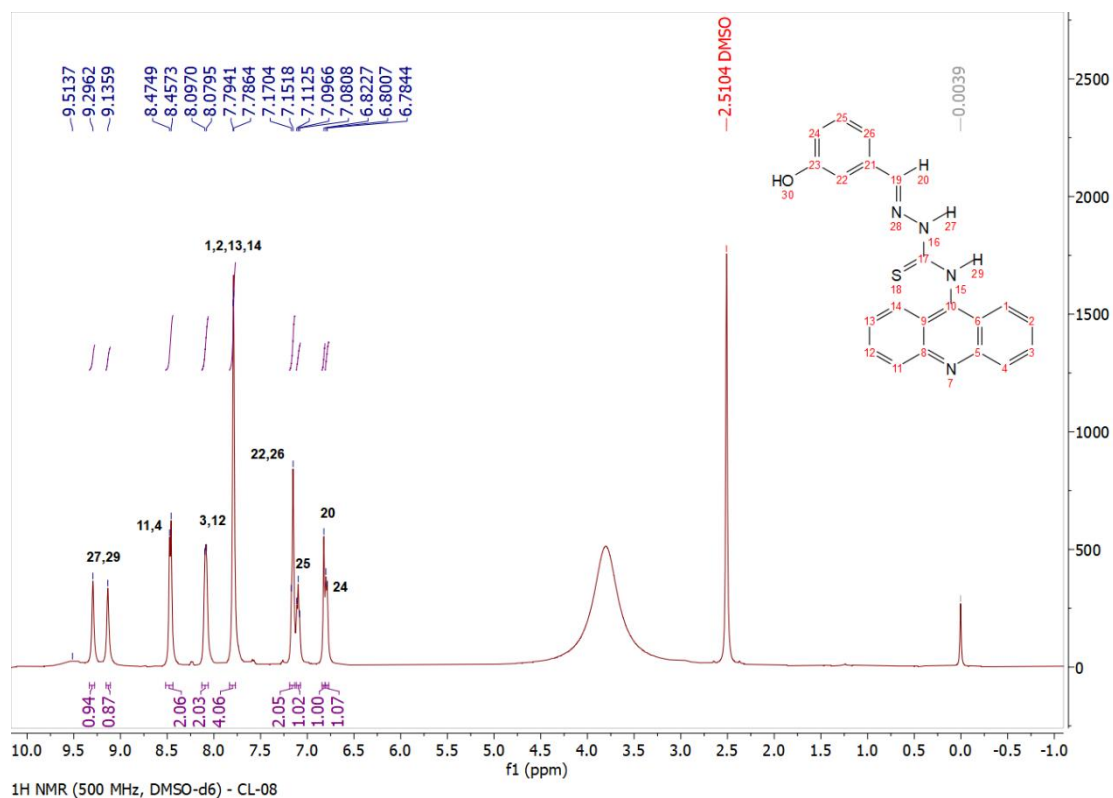

**Figure S18.** <sup>1</sup>H NMR spectrum of **CL-08**.

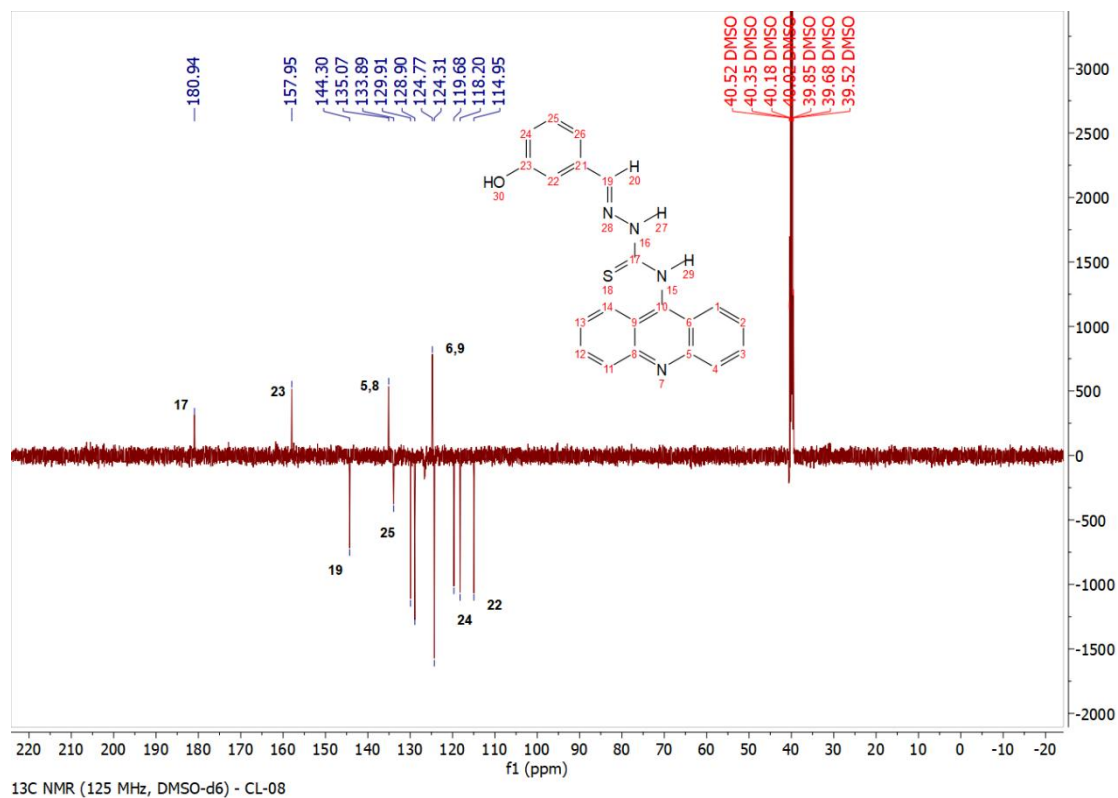

**Figure S19.** <sup>13</sup>C NMR spectrum of **CL-08**.

(E)-N-(acridin-9-yl)-2-(4-(dimethylamino)benzylidene)hydrazine-1-carbothioamide (**CL-09**)

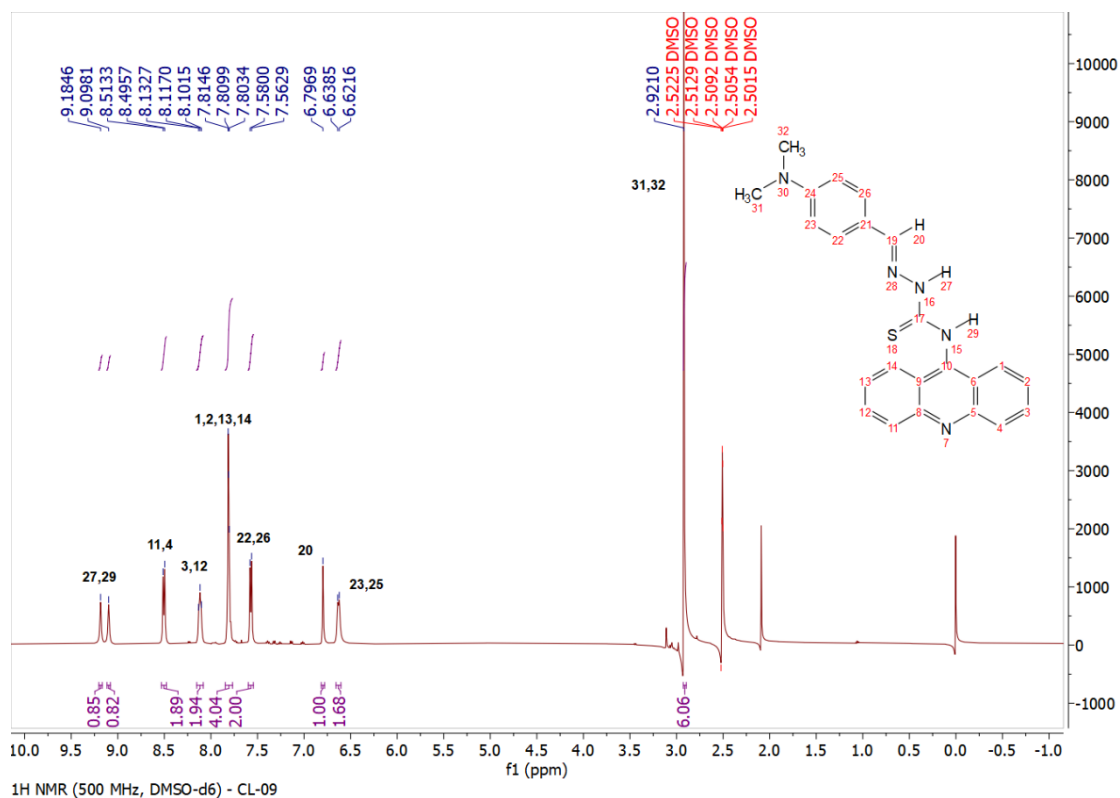

**Figure S20.** <sup>1</sup>H NMR spectrum of **CL-09**.



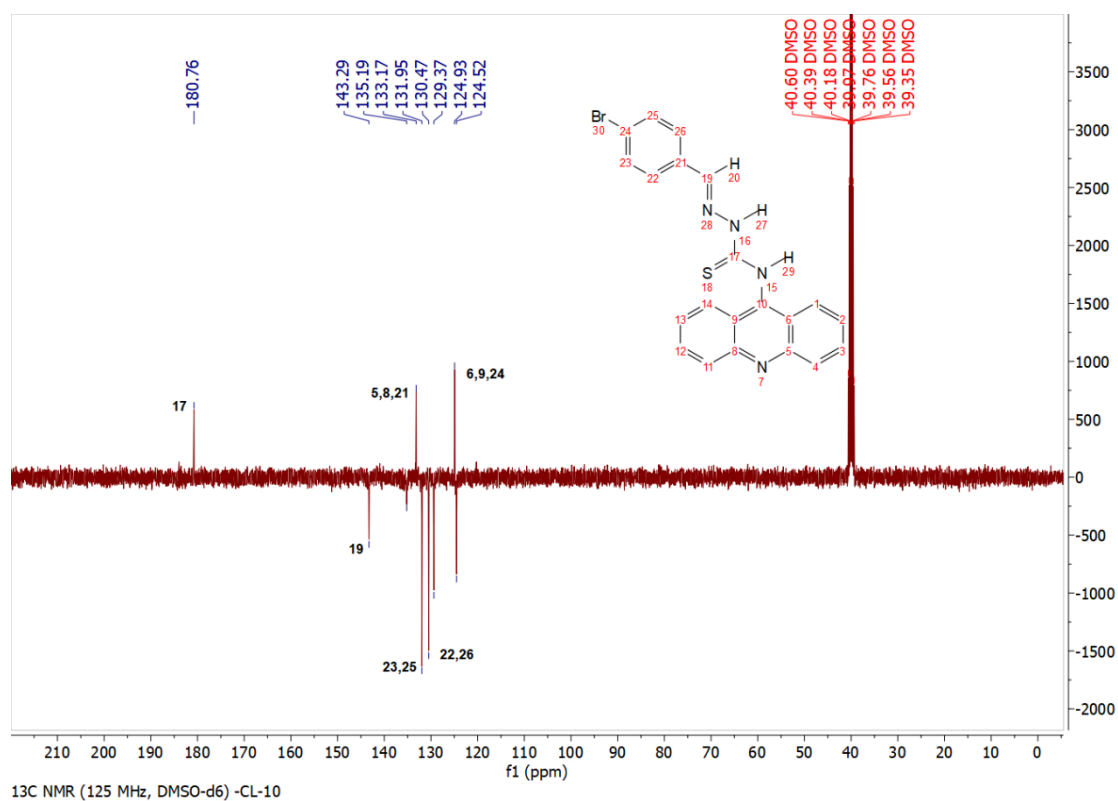

**Figure S23.**  $^{13}\text{C}$  NMR spectrum of **CL-10**.

(E)-2-benzylidene-N-(6-chloro-2-methoxyacridin-9-yl)hydrazine-1-carbothioamide (**DL-01**)

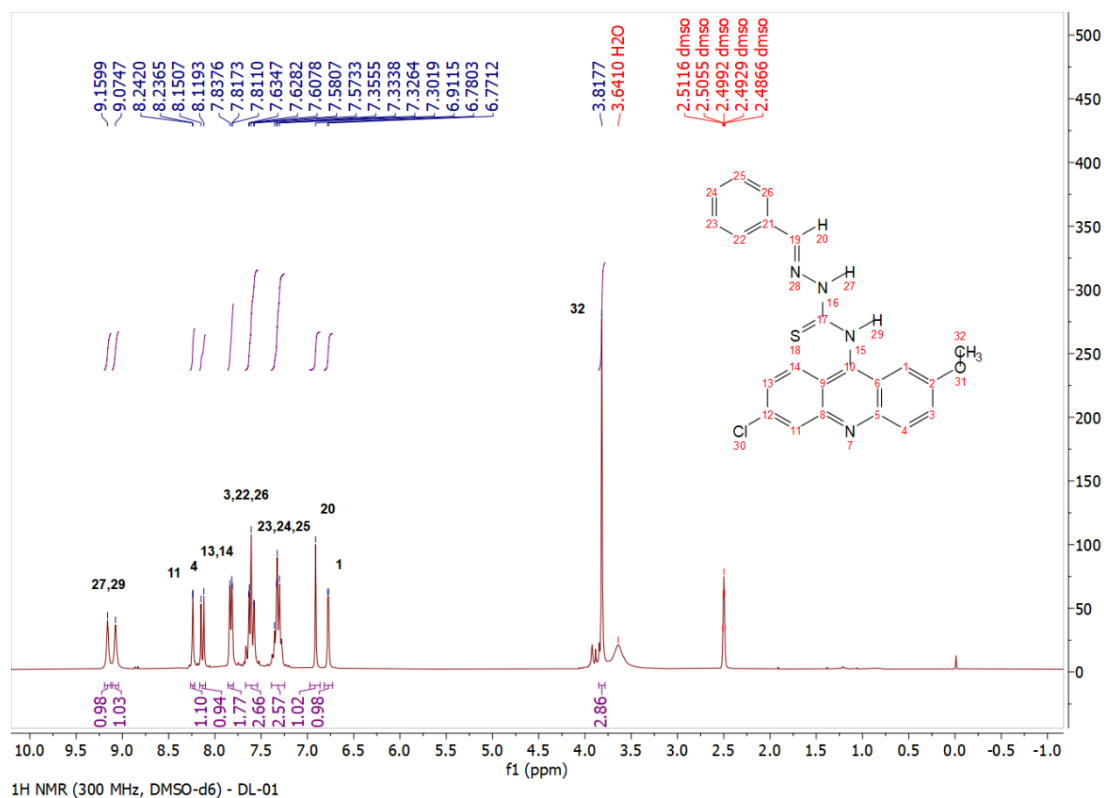

**Figure S24.**  $^1\text{H}$  NMR spectrum of **DL-01**.

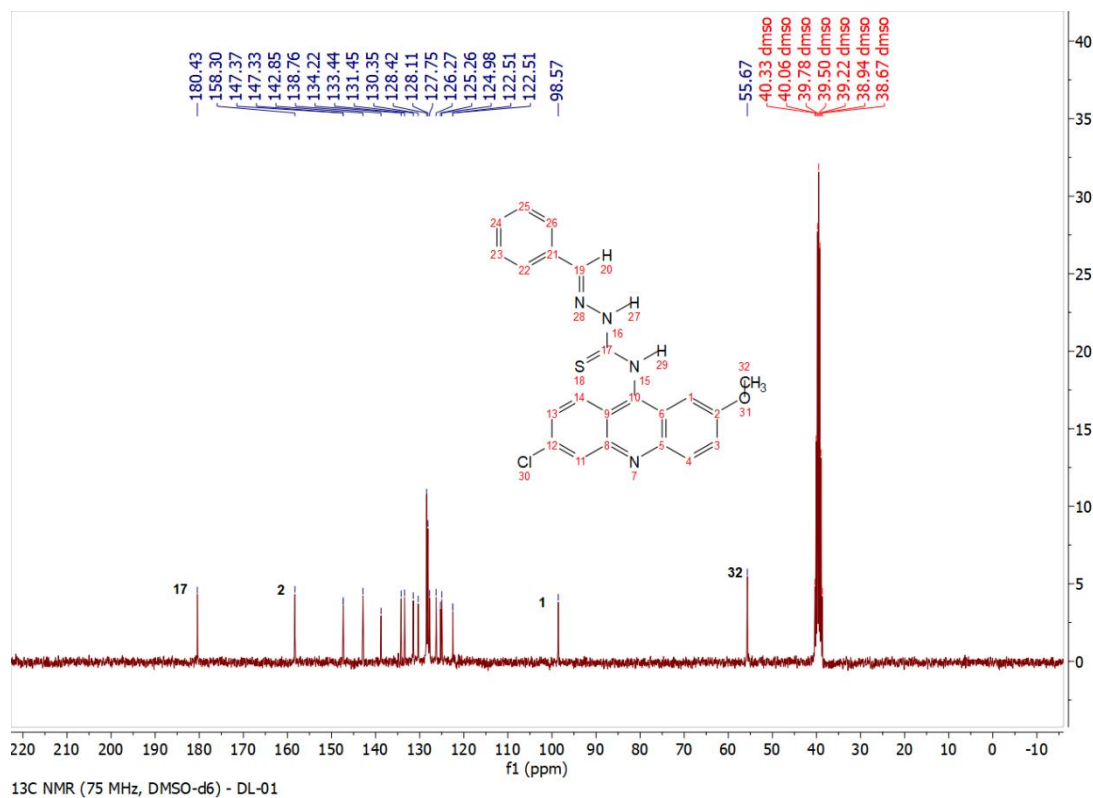

**Figure S25.** <sup>13</sup>C NMR spectrum of DL-01.

(E)-N-(6-chloro-2-methoxyacridin-9-yl)-2-(4-chlorobenzylidene)hydrazine-1-carbothioamide (DL-02)

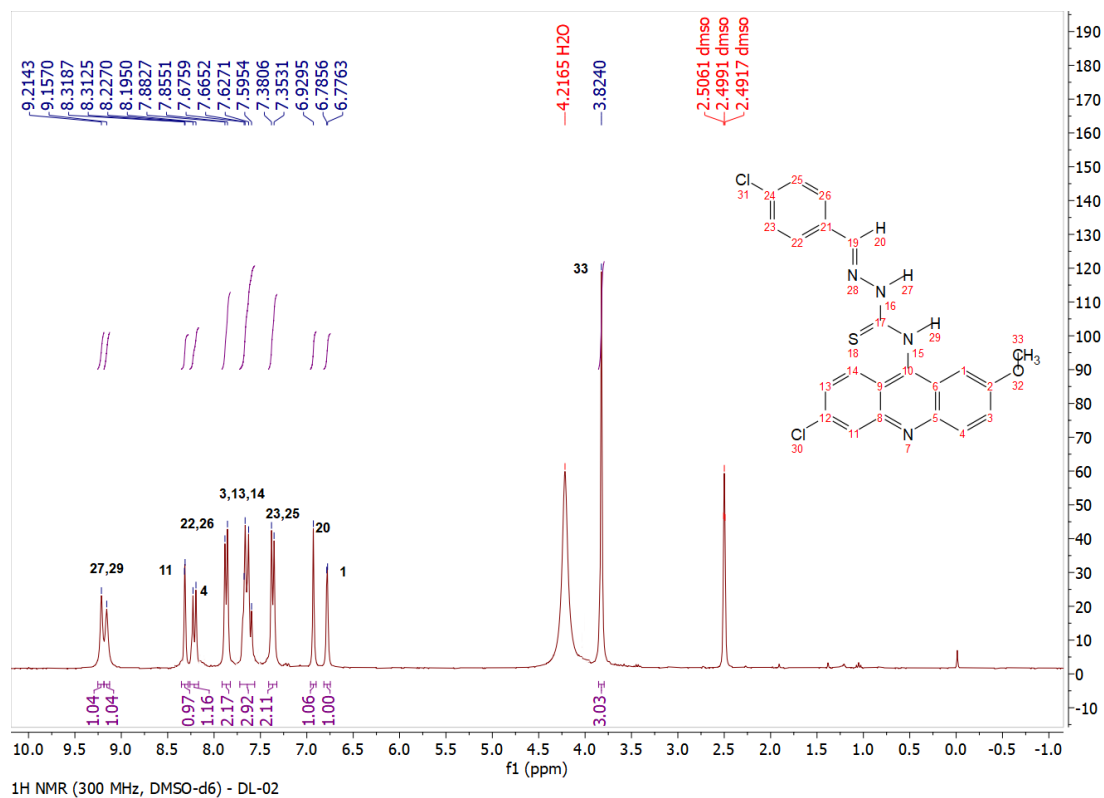

**Figure S26.** <sup>1</sup>H NMR spectrum of DL-02.

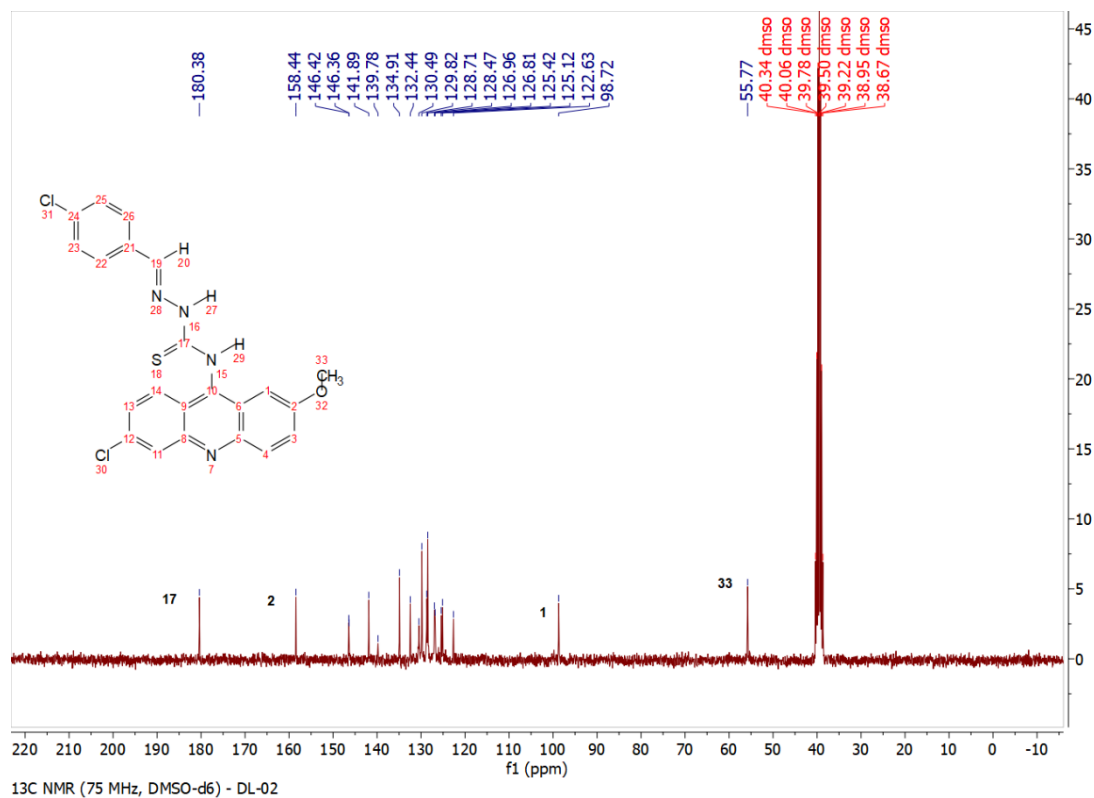

**Figure S27.** <sup>13</sup>C NMR spectrum of **DL-02**.

(E)-N-(6-chloro-2-methoxyacridin-9-yl)-2-(4-methoxybenzylidene)hydrazine-1-carbothioamide (**DL-03**)

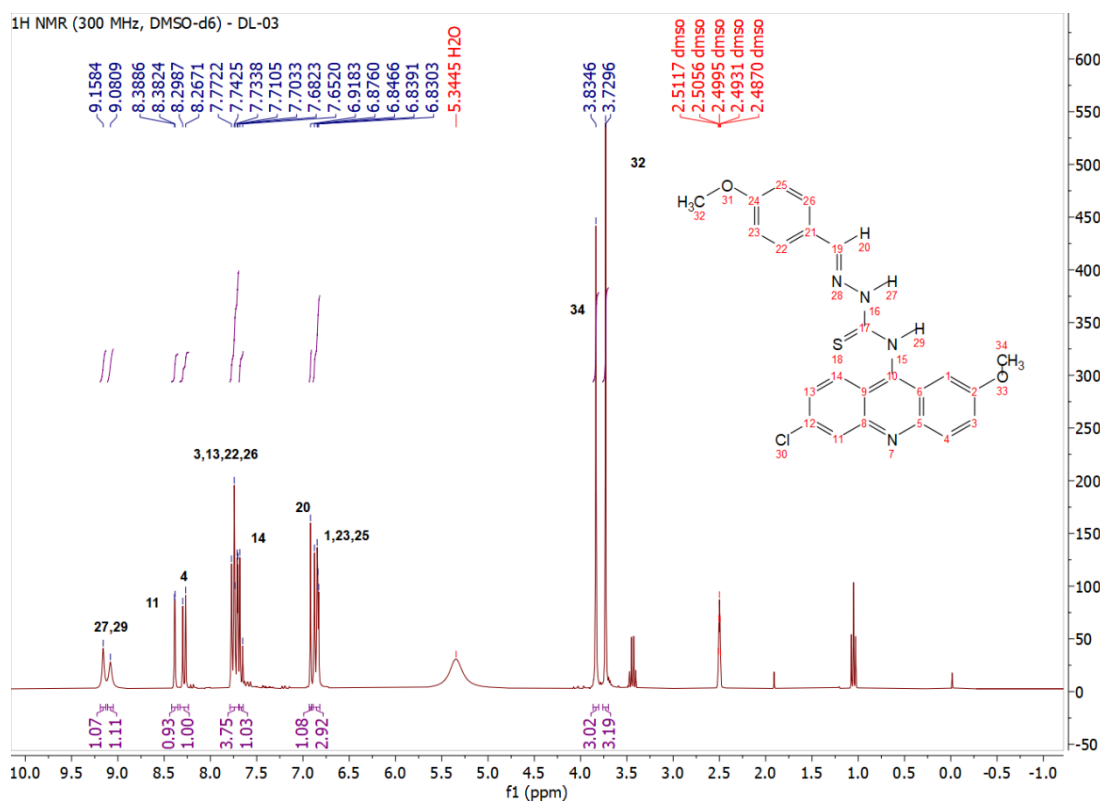

**Figure S28.** <sup>1</sup>H NMR spectrum of **DL-03**.

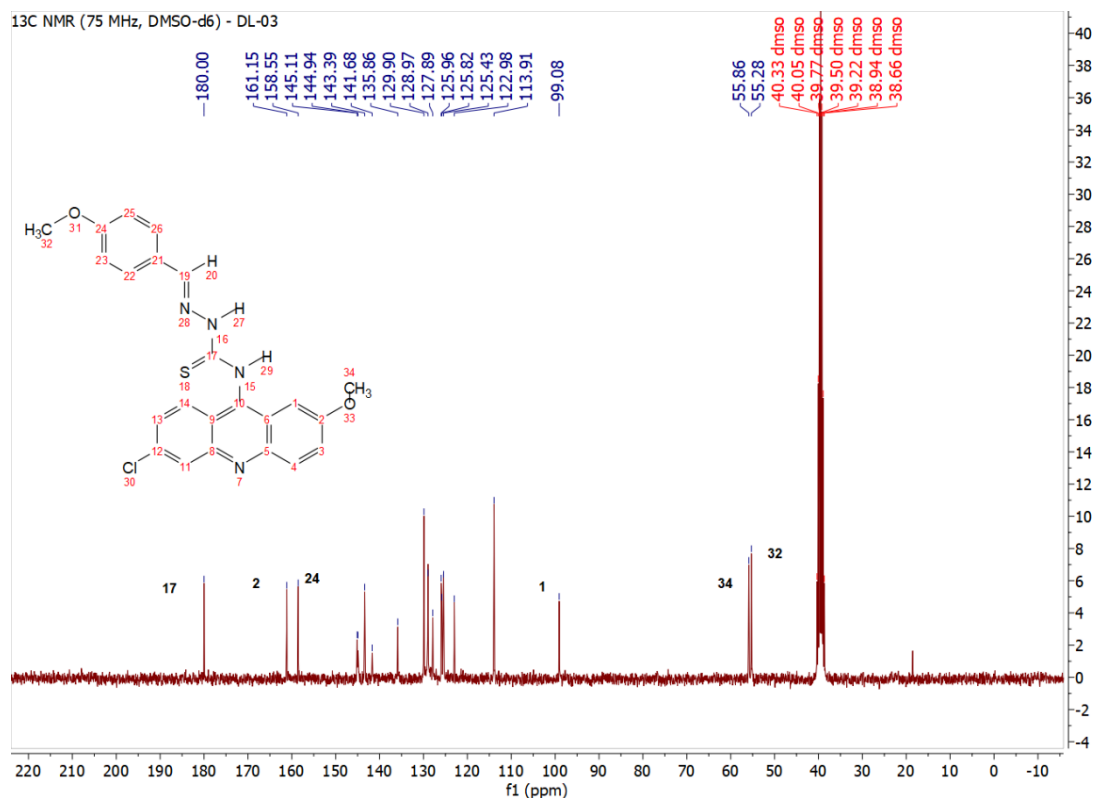

**Figure S29.** <sup>13</sup>C NMR spectrum of DL-03.

(E)-N-(6-chloro-2-methoxyacridin-9-yl)-2-(2,4-dichlorobenzylidene)hydrazine-1-carbothioamide (DL-04)

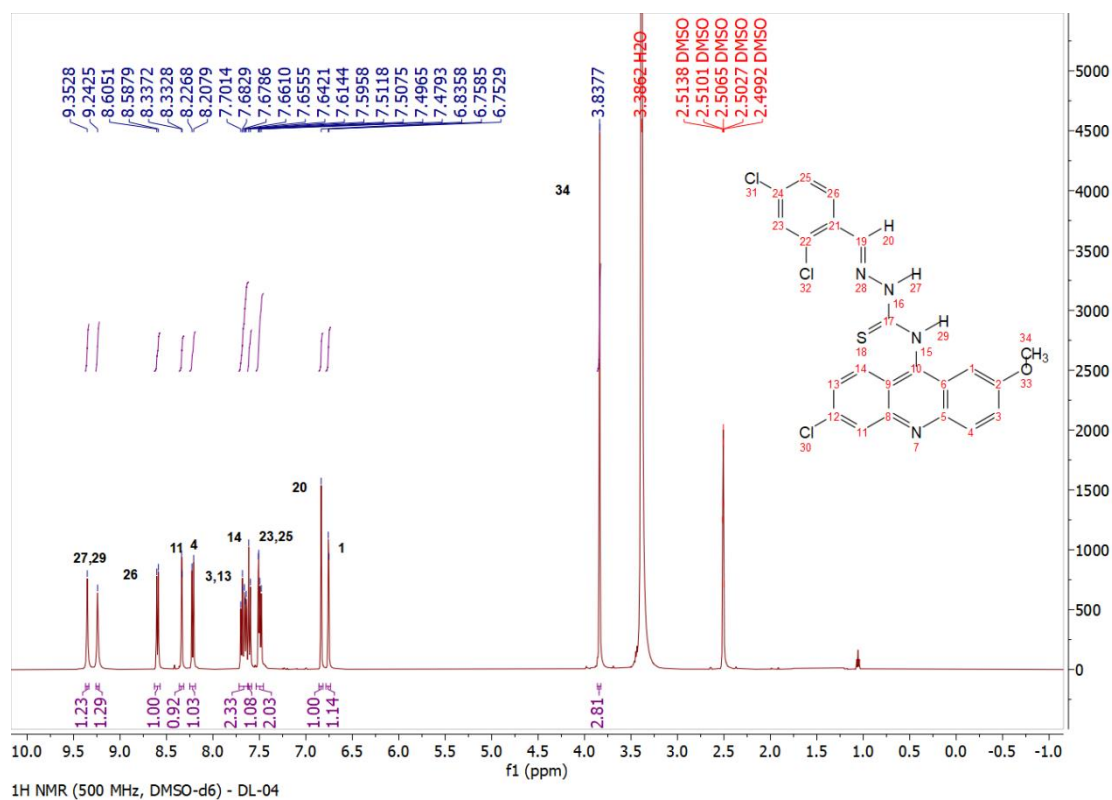

**Figure S30.** <sup>1</sup>H NMR spectrum of DL-04.



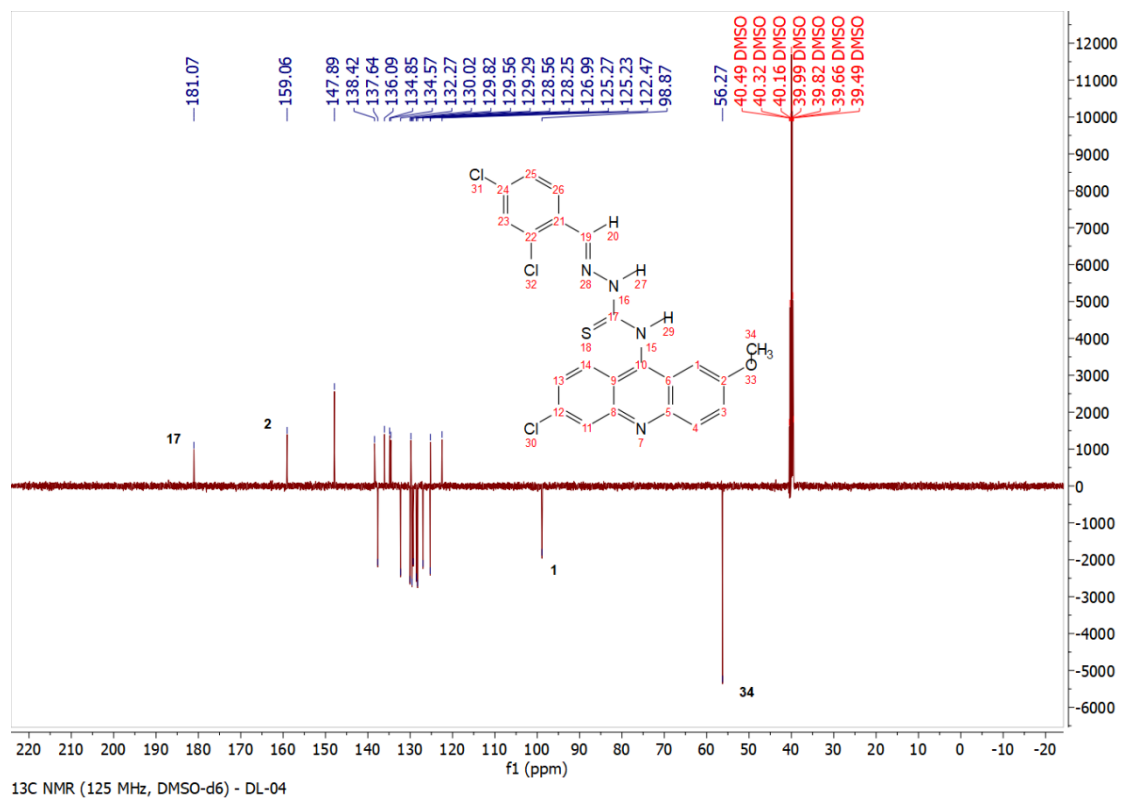

**Figure S31.** <sup>13</sup>C NMR spectrum of **DL-04**.

(E)-N-(6-chloro-2-methoxyacridin-9-yl)-2-(4-nitrobenzylidene)hydrazine-1-carbothioamide (**DL-05**)

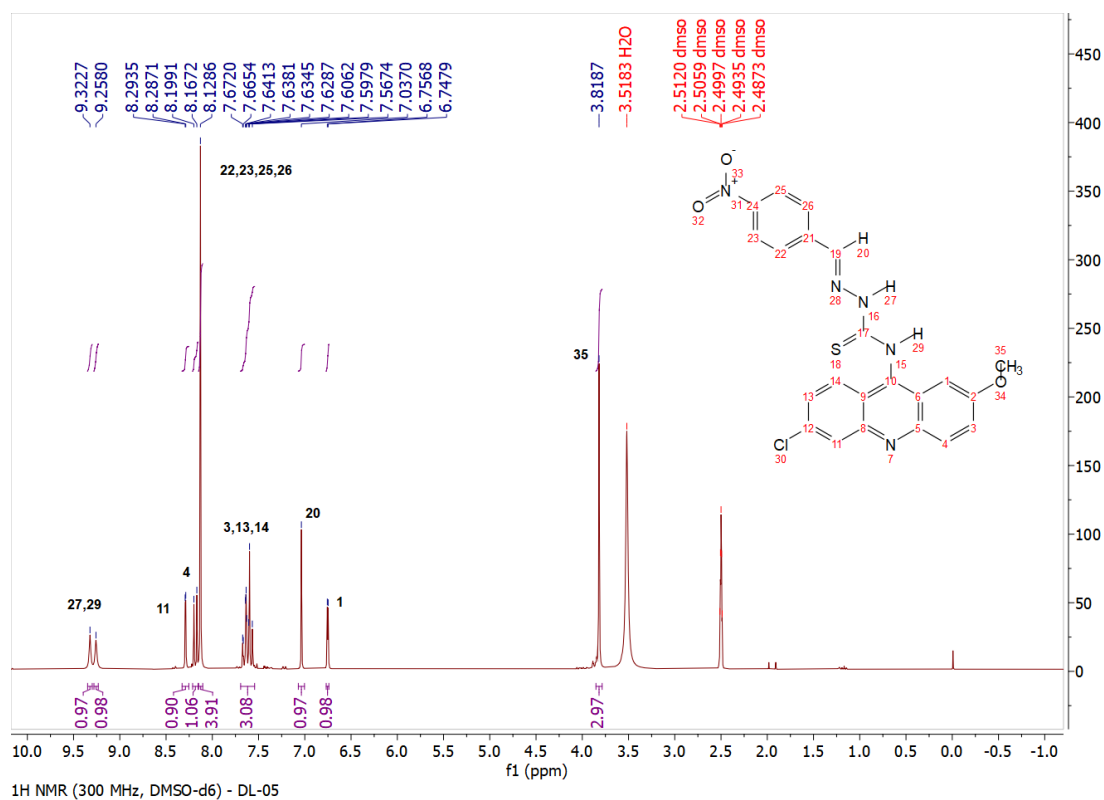

**Figure S32.** <sup>1</sup>H NMR spectrum of **DL-05**.

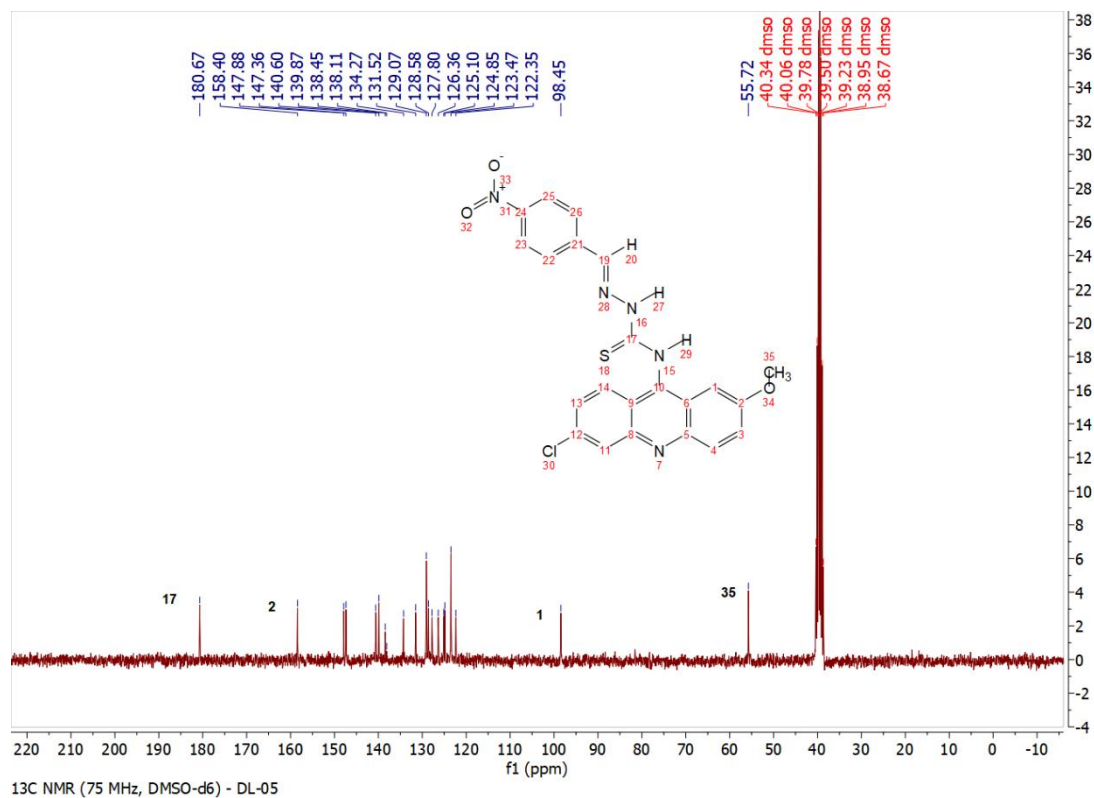

**Figure S33.** <sup>13</sup>C NMR spectrum of **DL-05**.

(E)-N-(6-chloro-2-methoxyacridin-9-yl)-2-(4-methylbenzylidene)hydrazine-1-carbothioamide (**DL-06**)

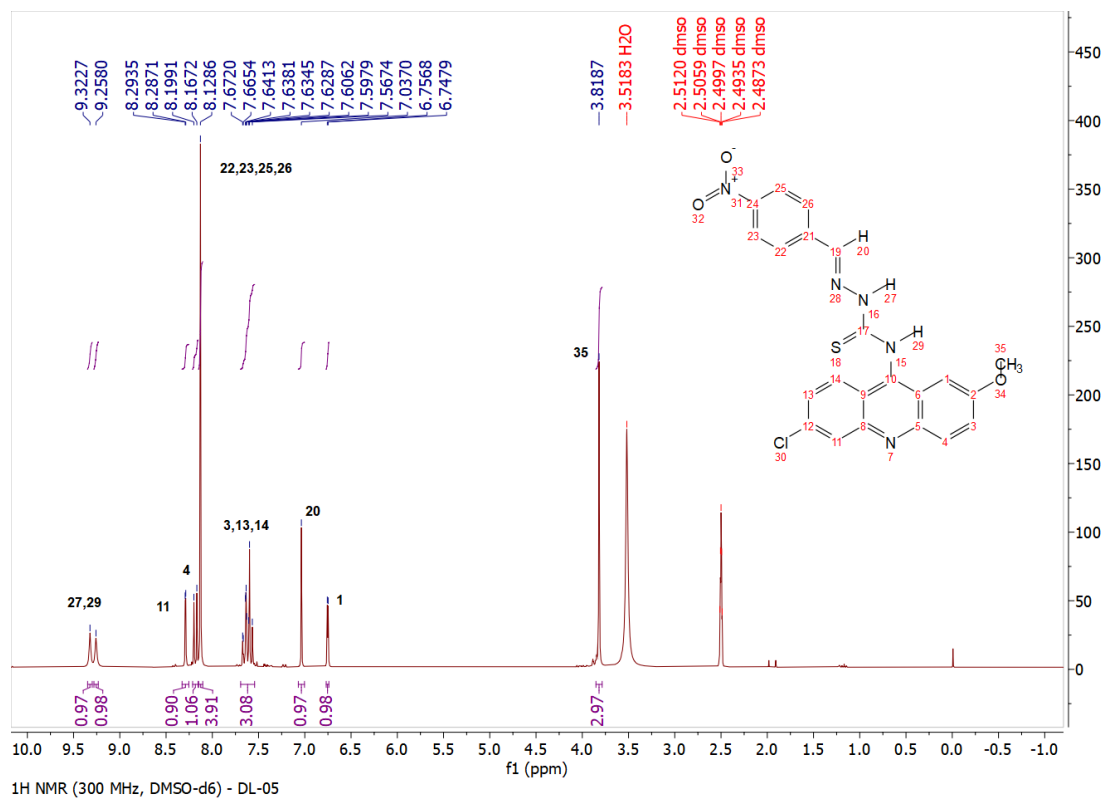

**Figure S34.** <sup>1</sup>H NMR spectrum of **DL-06**.



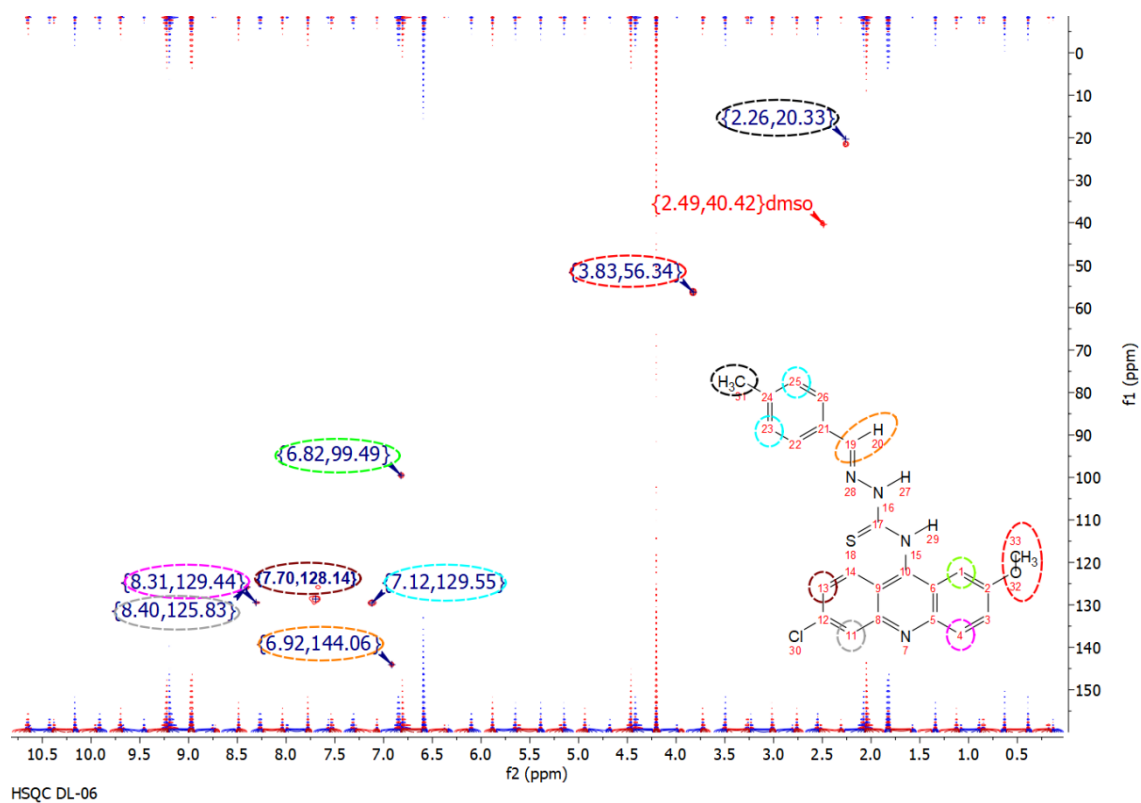

**Figure S37.** HSQC spectrum of **DL-06** (Solvent: DMSO).

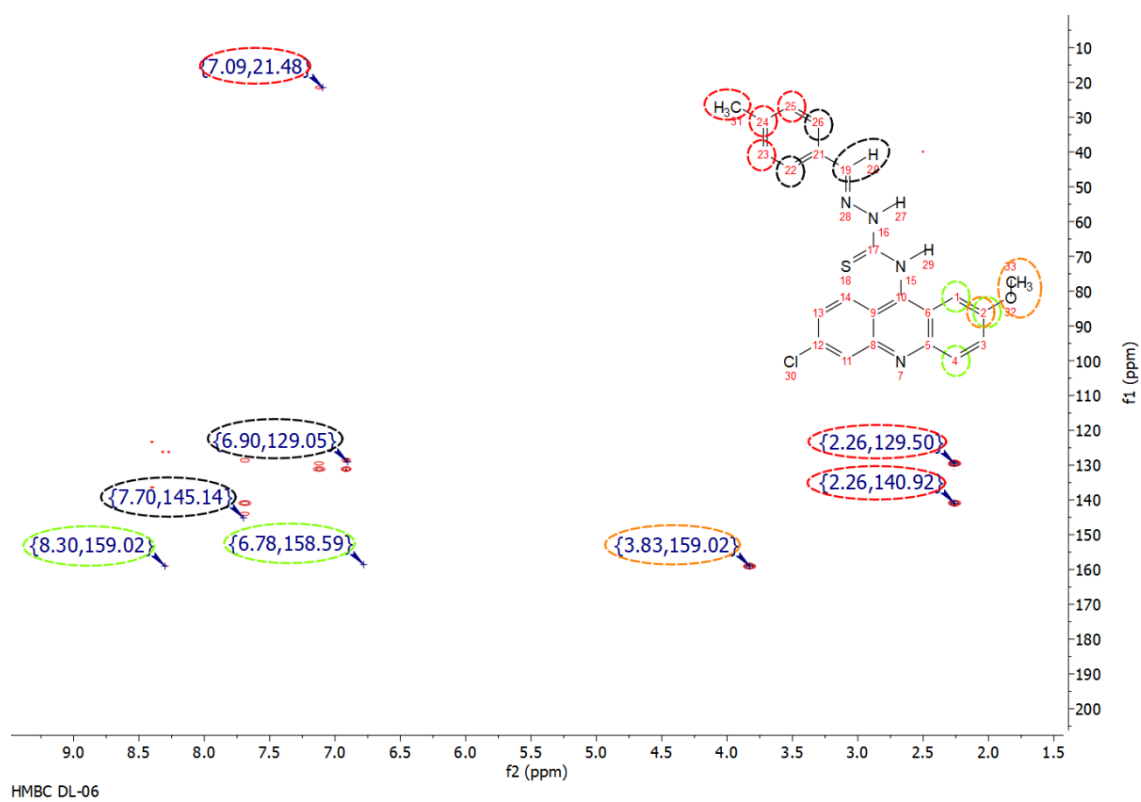

**Figure S38.** HMBC spectrum of **DL-06** (Solvent: DMSO).

(E)-N-(6-chloro-2-methoxyacridin-9-yl)-2-(4-hydroxybenzylidene)hydrazine-1-carbothioamide (**DL-07**)

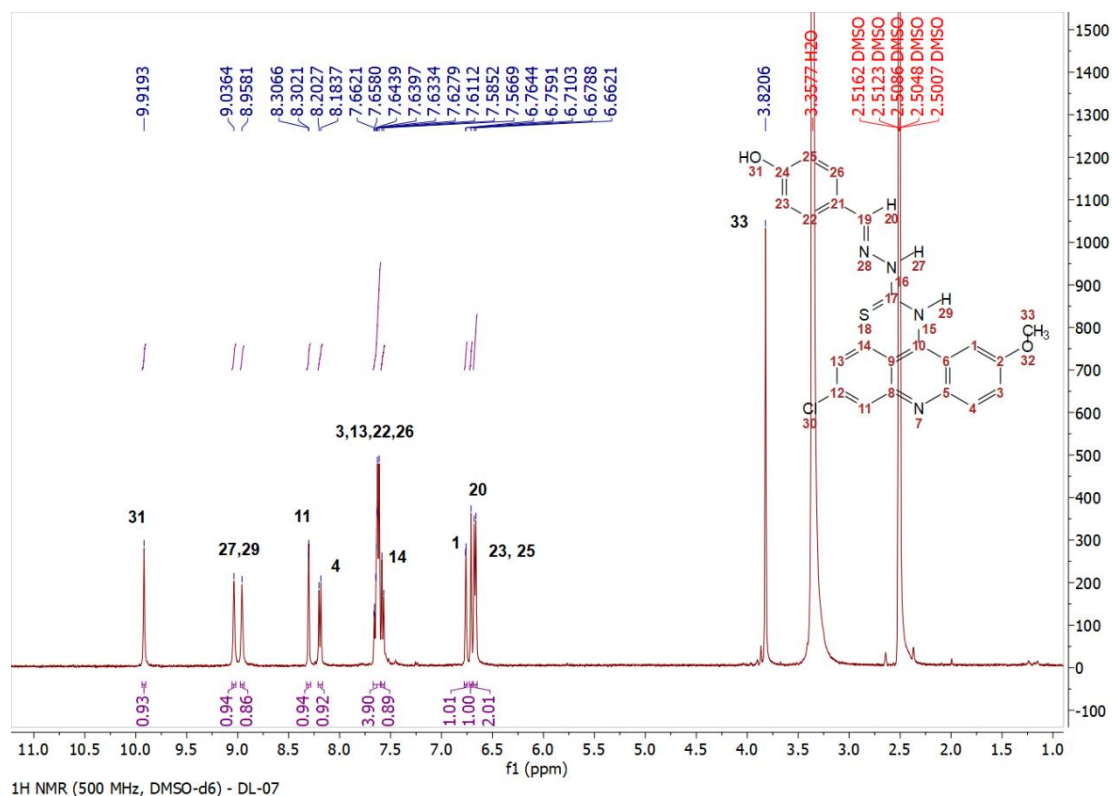

Figure S39. <sup>1</sup>H NMR spectrum of **DL-07**.

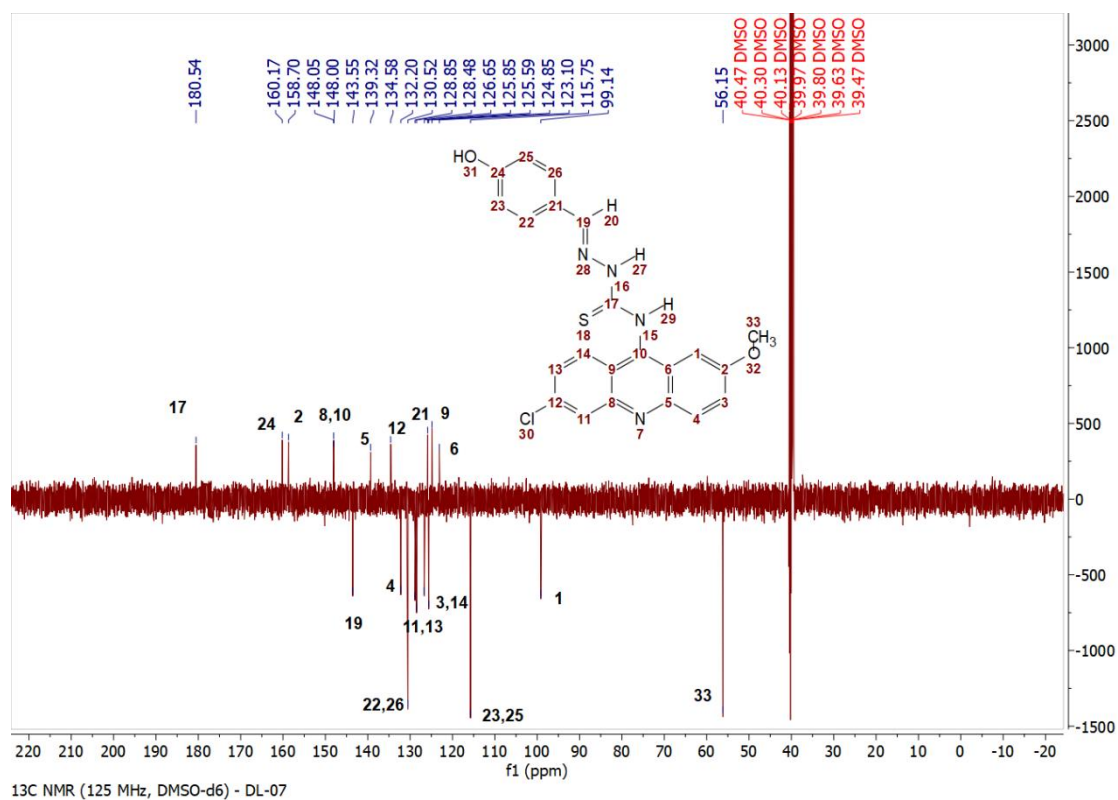

Figure S40. <sup>13</sup>C NMR spectrum of **DL-07**.

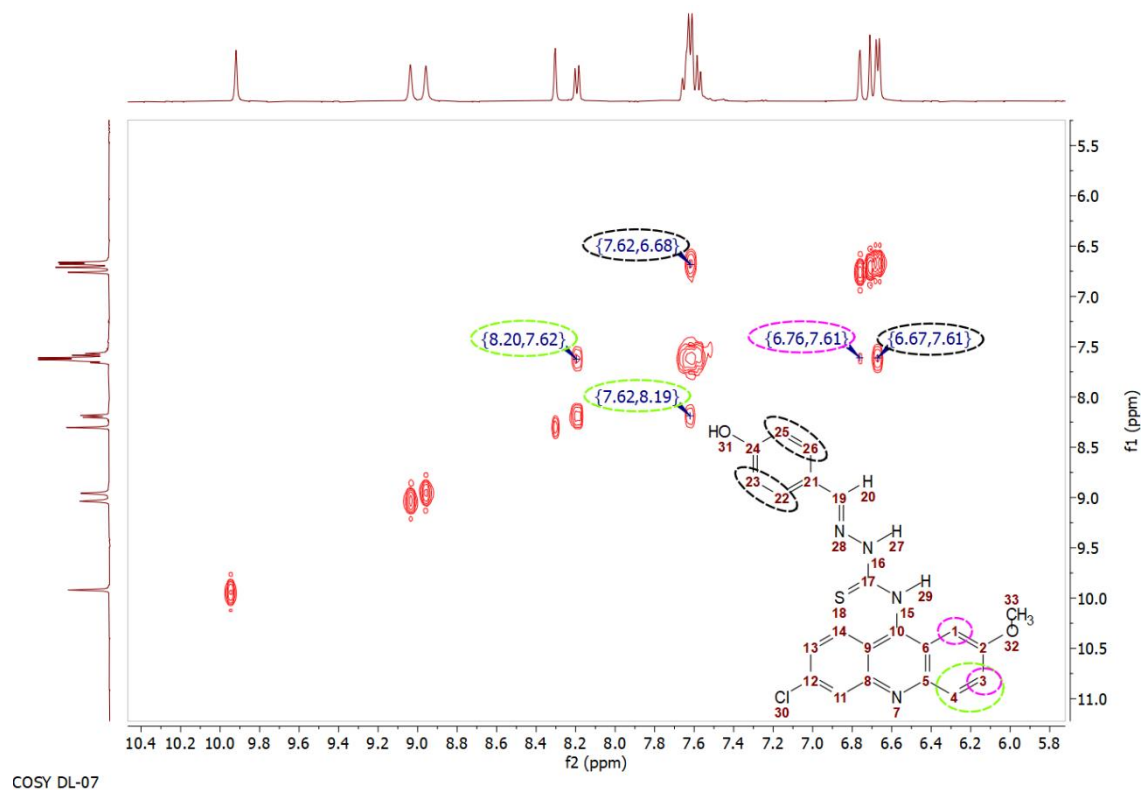

**Figure S41.** COSY spectrum of **DL-07** (Solvent: DMSO).

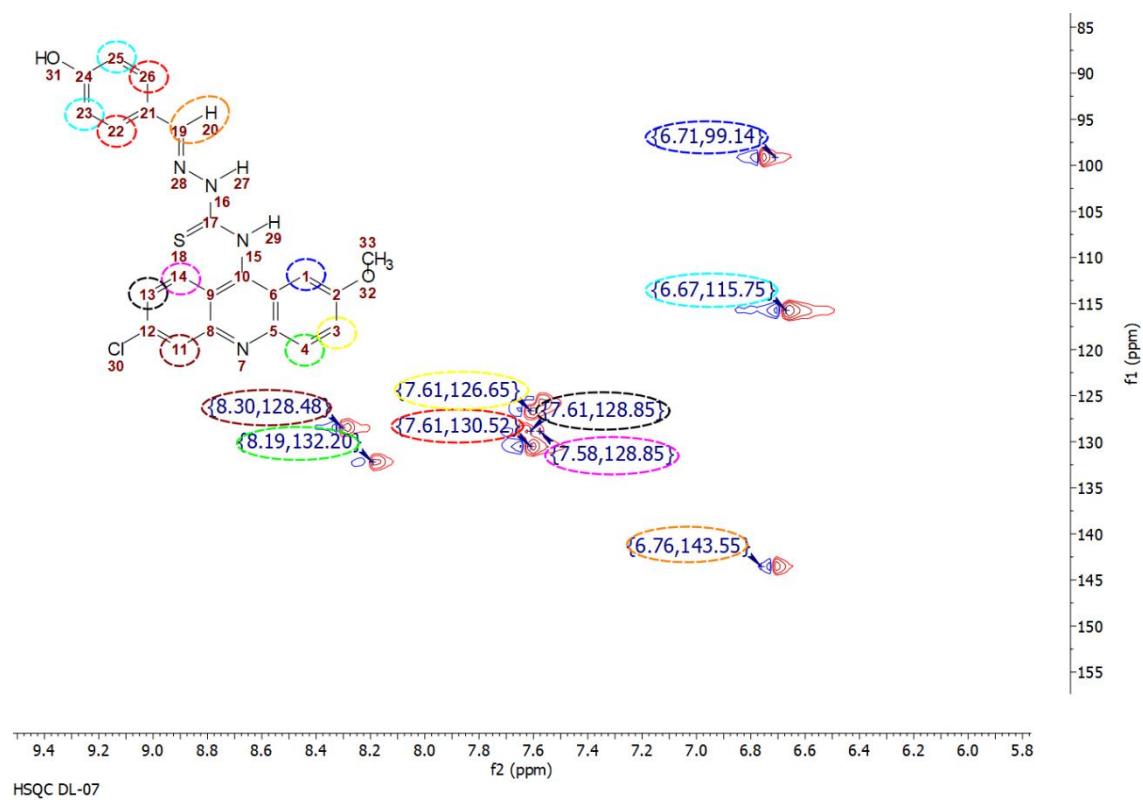

**Figure S42.** HSQC spectrum of **DL-07** (Solvent: DMSO).

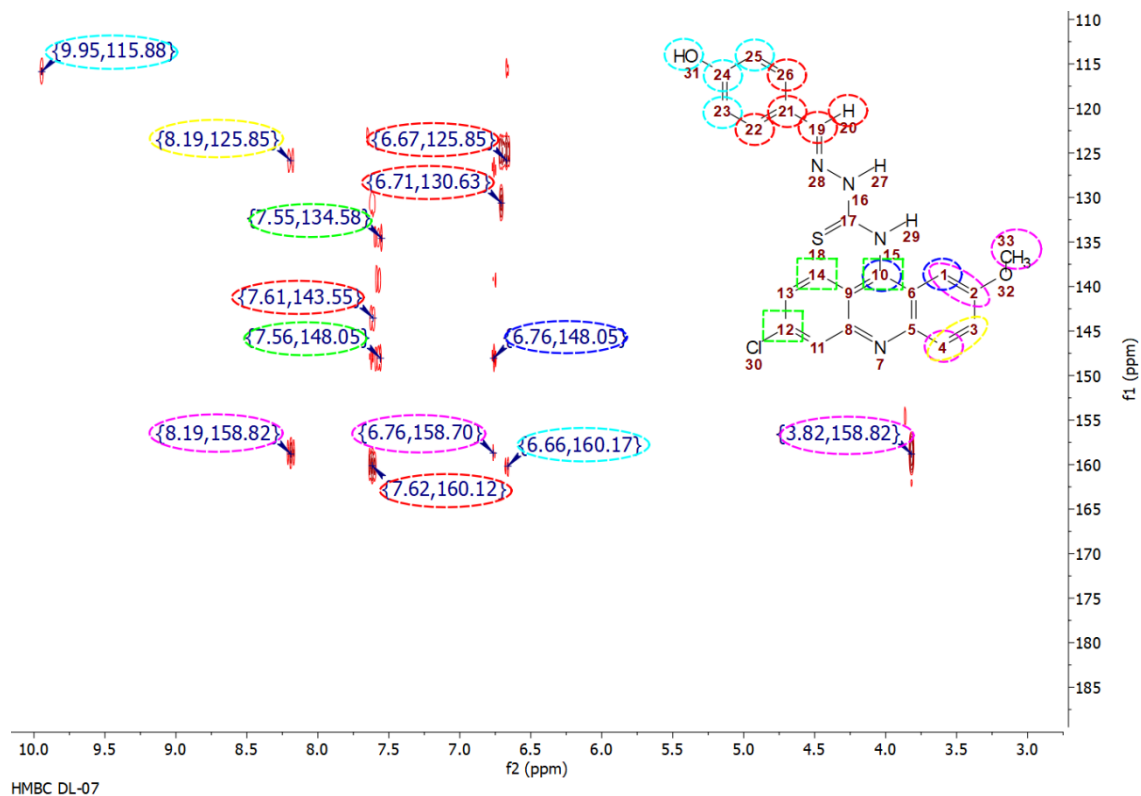

**Figure S43.** HMBC spectrum of **DL-07** (Solvent: DMSO).

(E)-N-(6-chloro-2-methoxyacridin-9-yl)-2-(3-hydroxybenzylidene)hydrazine-1-carbothioamide (**DL-08**)

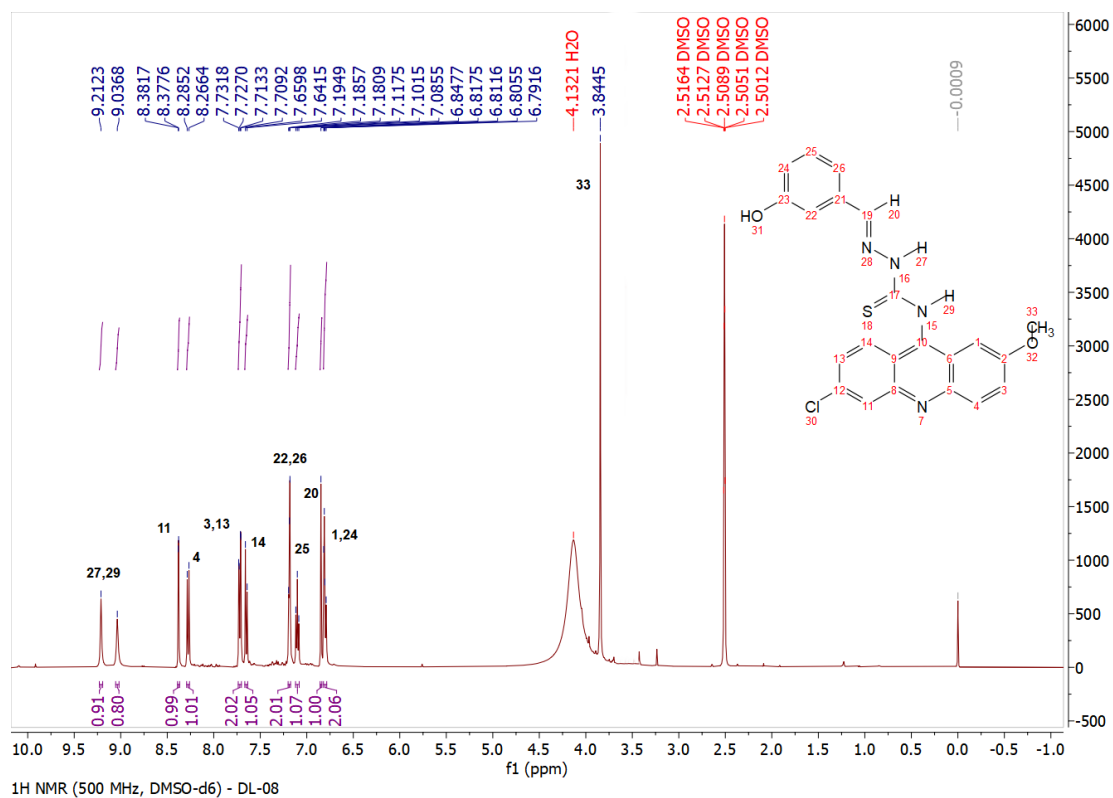

**Figure S44.**  $^1\text{H}$  NMR spectrum of **DL-08**.



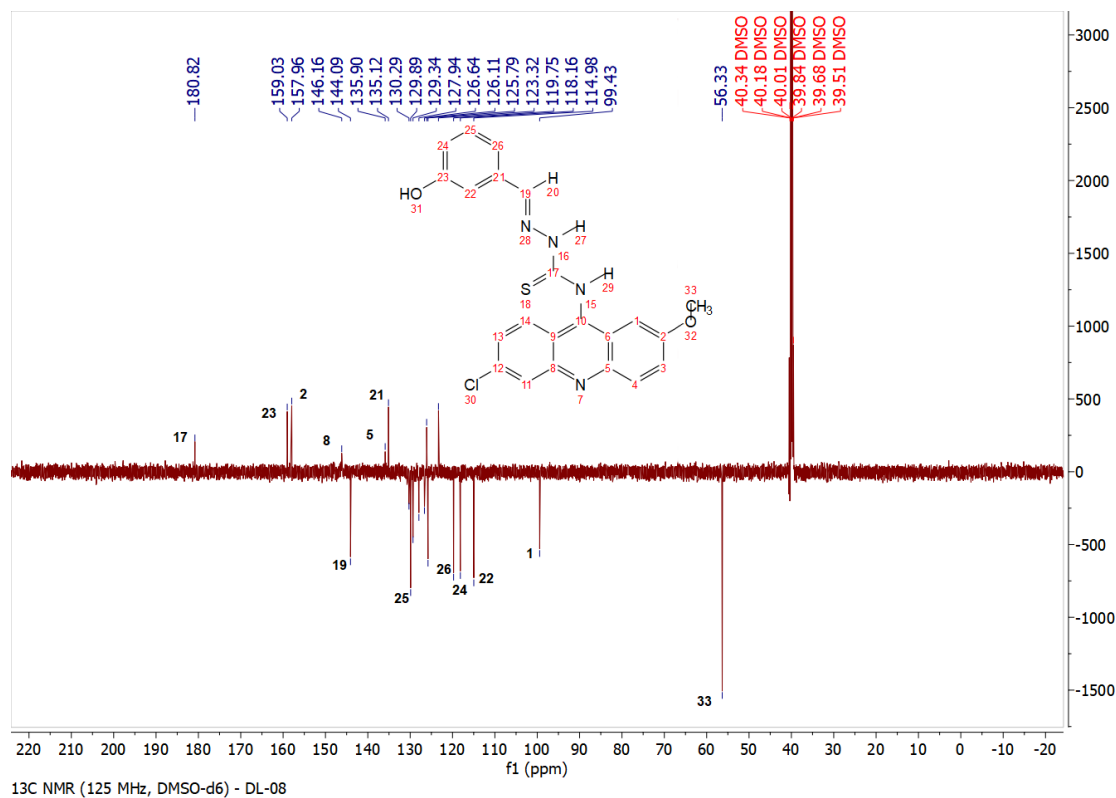

**Figure S45.** <sup>13</sup>C NMR spectrum of **DL-08**.

(E)-N-(6-chloro-2-methoxyacridin-9-yl)-2-(4-(dimethylamino)benzylidene)hydrazine-1-carbothioamide (**DL-09**)

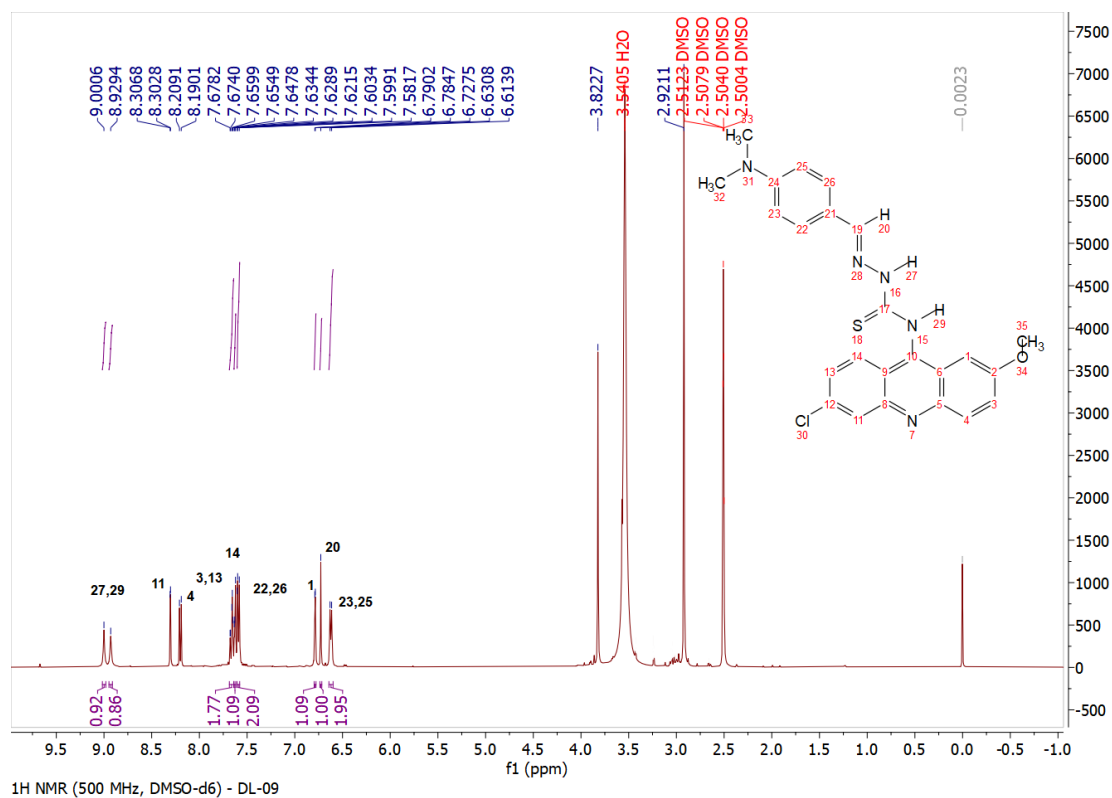

**Figure S46.** <sup>1</sup>H NMR spectrum of **DL-09**.



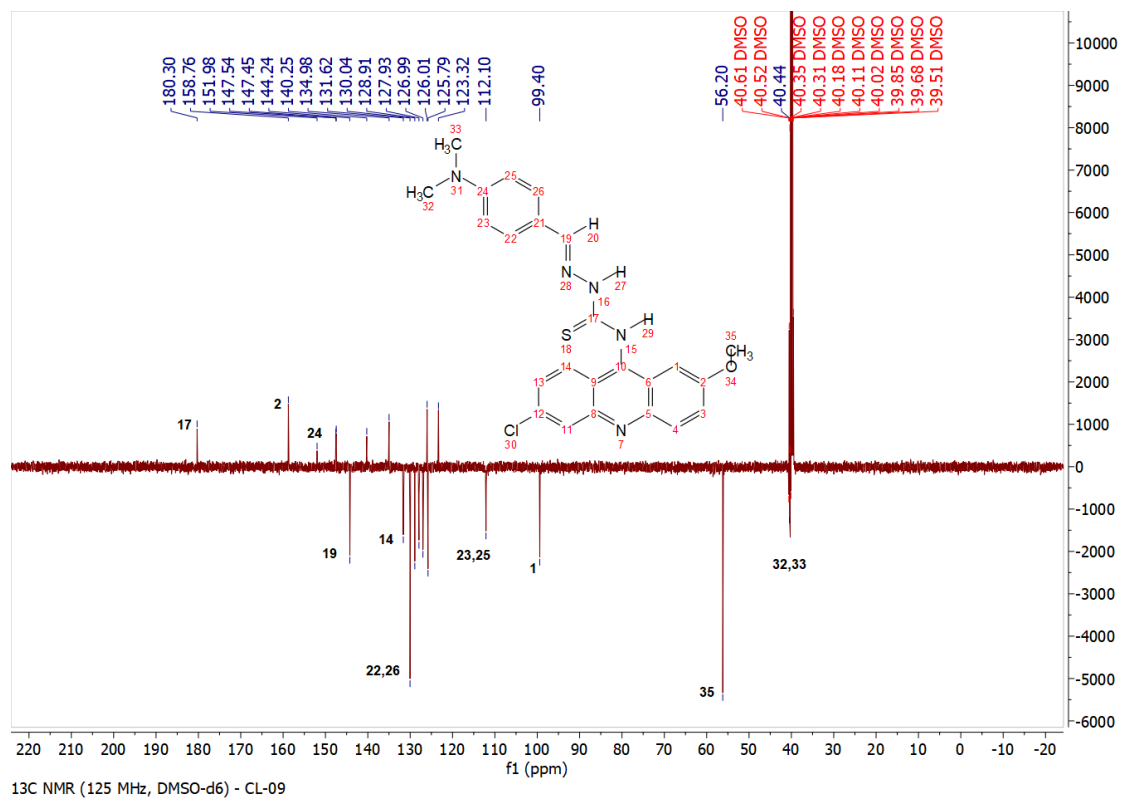

**Figure S47.** <sup>13</sup>C NMR spectrum of **DL-09**.

(E)-2-(4-bromobenzylidene)-N-(6-chloro-2-methoxyacridin-9-yl)hydrazine-1-carbothioamide (**DL-10**)

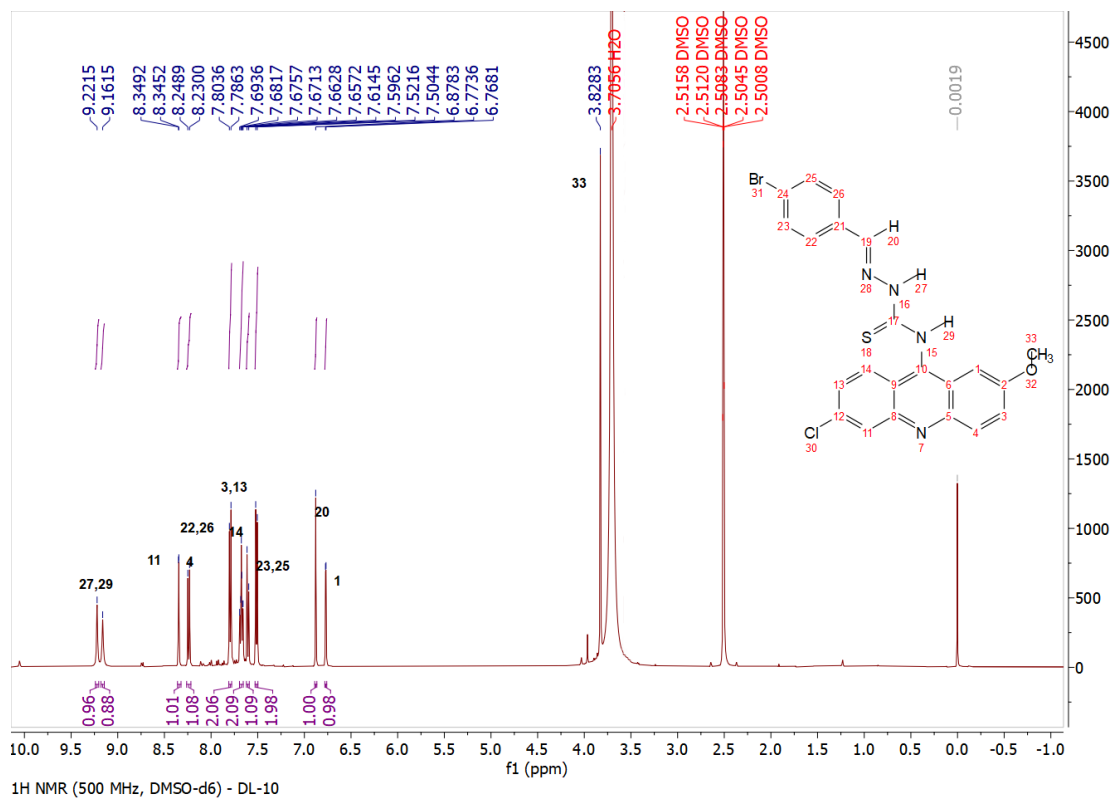

**Figure S48.** <sup>1</sup>H NMR spectrum of **DL-10**.

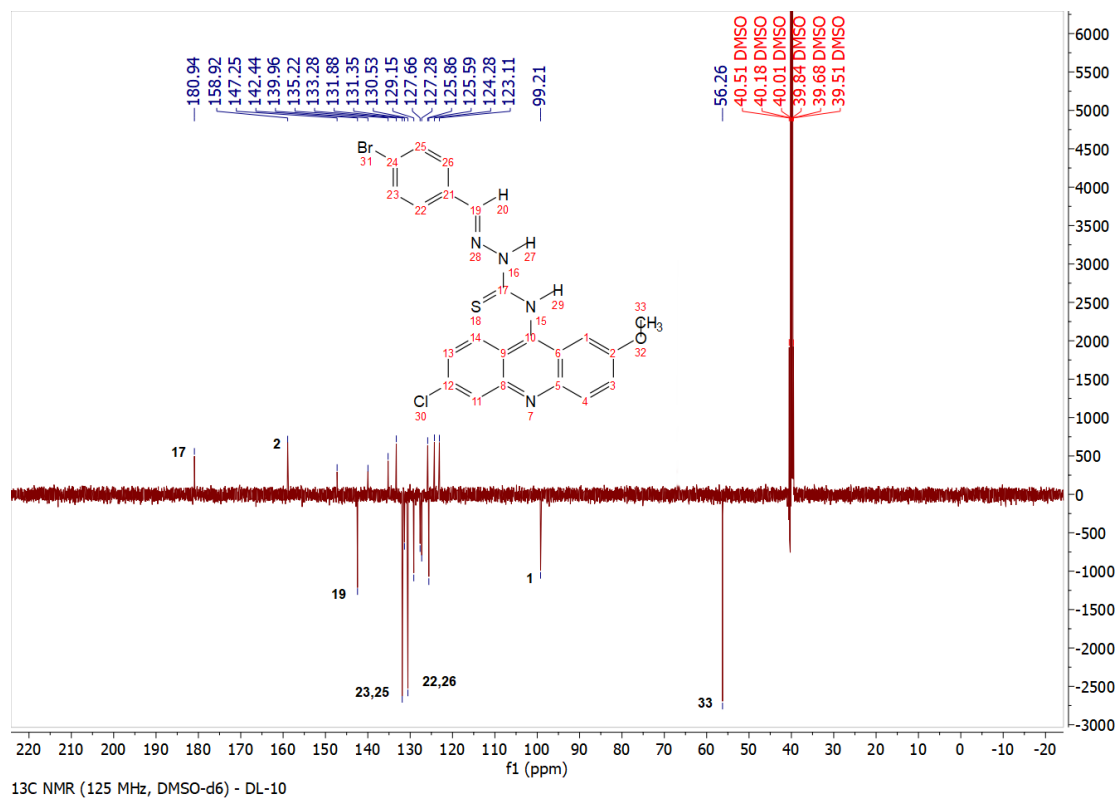

**Figure S49.**  $^{13}\text{C}$  NMR spectrum of **DL-10**.

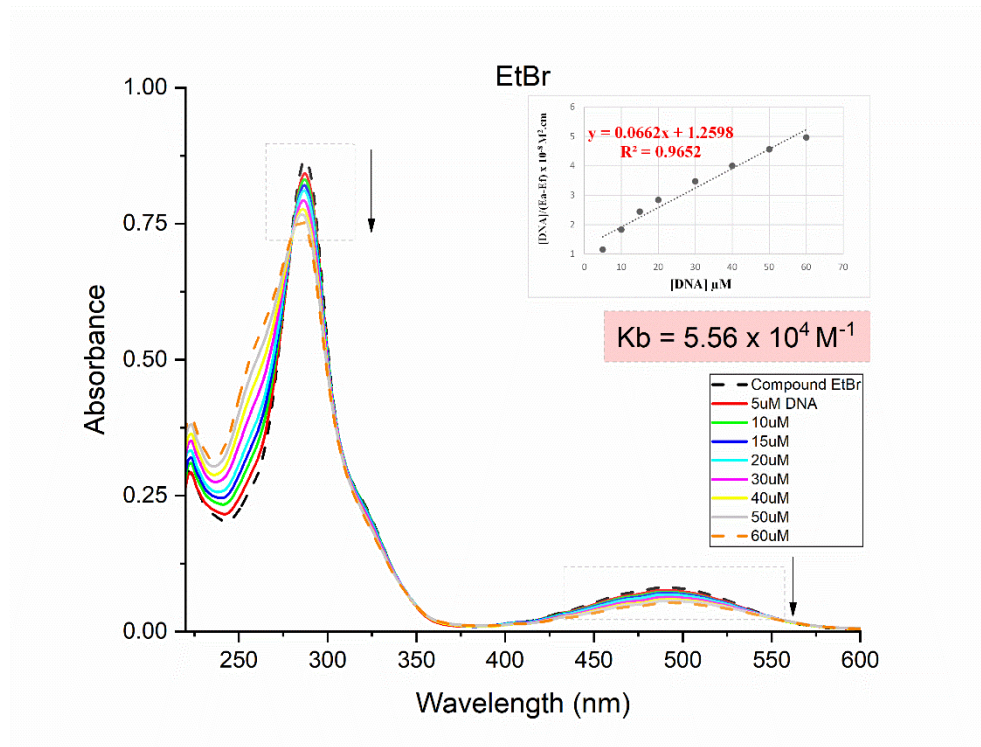

**Figure S50.** Absorption spectra of **EtBr** at  $40 \mu\text{mol L}^{-1}$  in Tris-HCl buffer (pH 7.4) in the presence of ct-DNA in different concentrations (0, 5, 10, 20, 30, 40, 50 and  $60 \mu\text{mol L}^{-1}$ ).  $\lambda$  (Kb) = 489 nm.

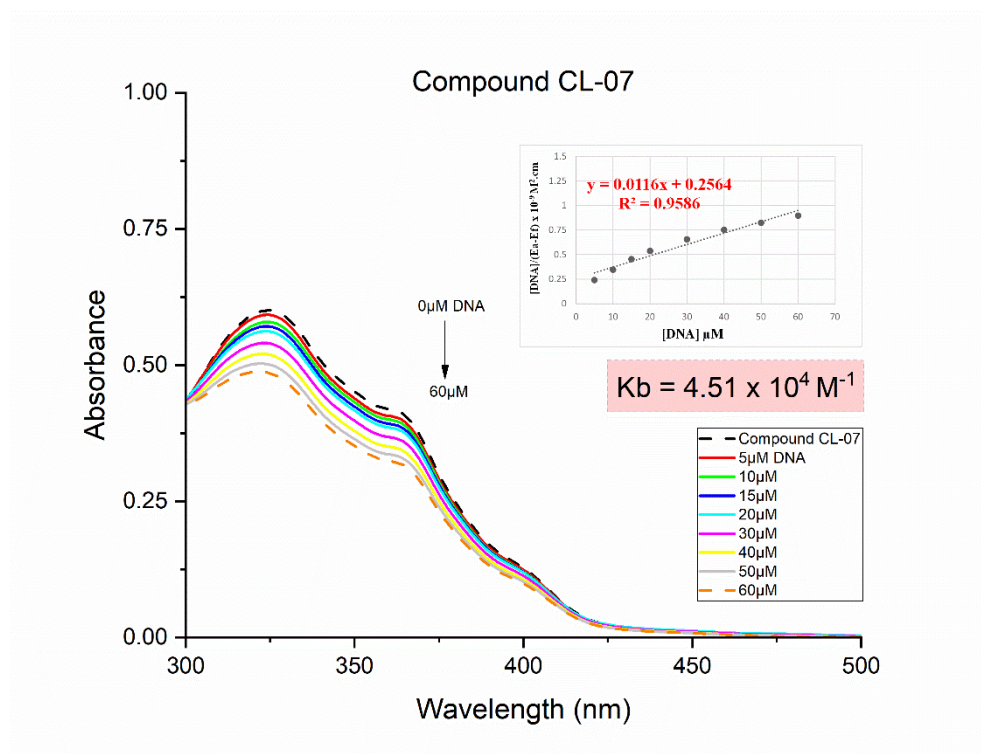

**Figure S51.** Absorption spectra of **CL-07** at  $40 \mu\text{mol L}^{-1}$  in Tris-HCl buffer (pH 7.4) in the presence of CT DNA in different concentrations (0, 5, 10, 20, 30, 40, 50 and  $60 \mu\text{mol L}^{-1}$ ).  $\lambda$  (Kb) = 325 nm.

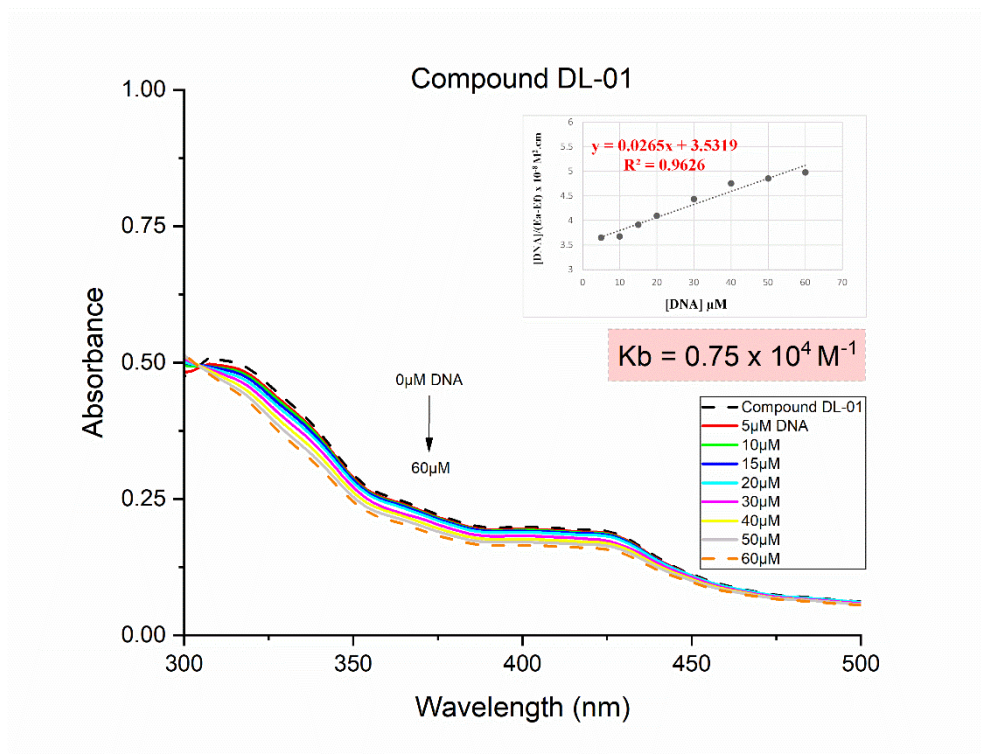

**Figure S52.** Absorption spectra of **DL-01** at  $40 \mu\text{mol L}^{-1}$  in Tris-HCl buffer (pH 7.4) in the presence of CT DNA in different concentrations (0, 5, 10, 20, 30, 40, 50 and  $60 \mu\text{mol L}^{-1}$ ).  $\lambda$  (Kb) = 320 nm.

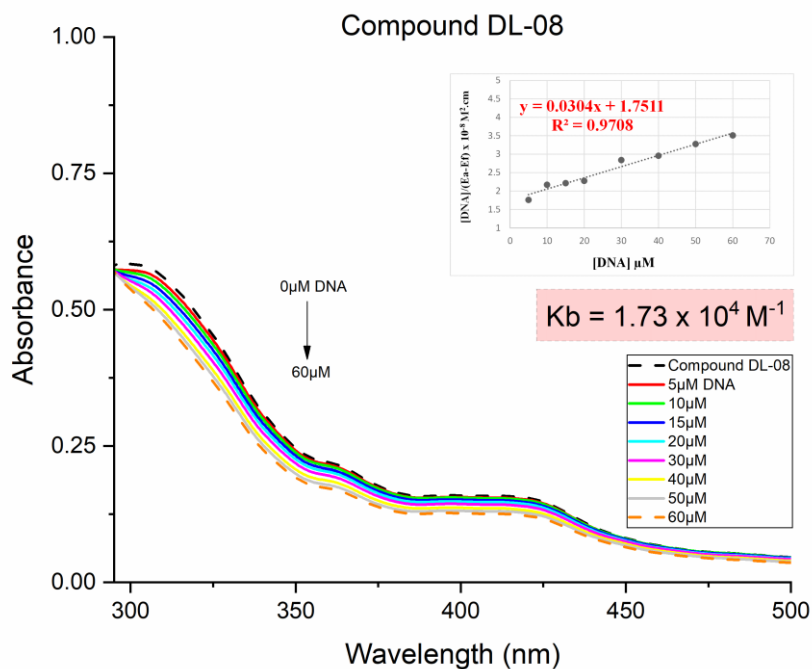

**Figure S53.** Absorption spectra of **DL-08** at 40  $\mu\text{mol L}^{-1}$  in Tris-HCl buffer (pH 7.4) in the presence of ct-DNA in different concentrations (0, 5, 10, 20, 30, 40, 50 and 60  $\mu\text{mol L}^{-1}$ ).  $\lambda$  ( $K_b$ ) = 305 nm.

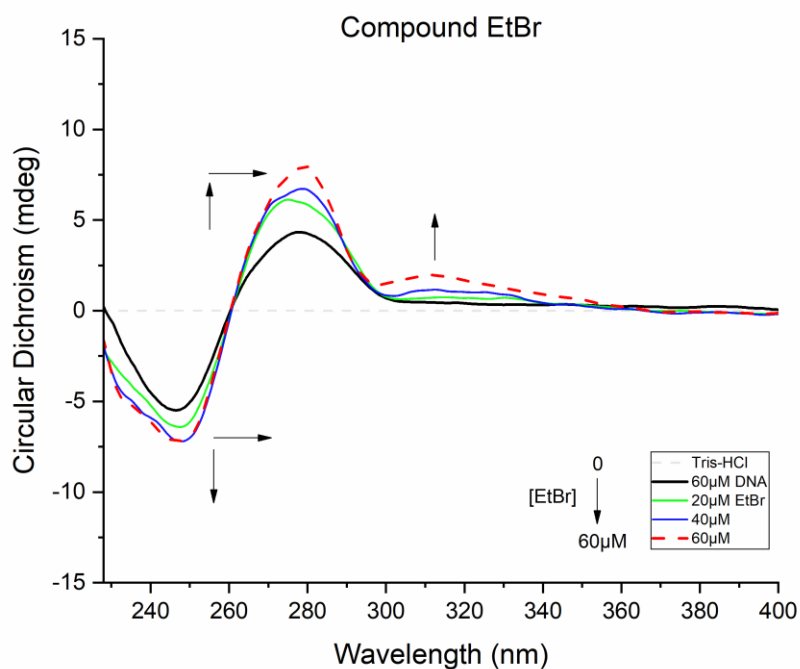

**Figure S54.** Circular dichroism of DNA at a concentration of 60  $\mu\text{mol L}^{-1}$  in Tris-HCl buffer (pH 7.4), in the presence of increasing concentrations of **EtBr** (20, 40 and 60  $\mu\text{mol L}^{-1}$ ).

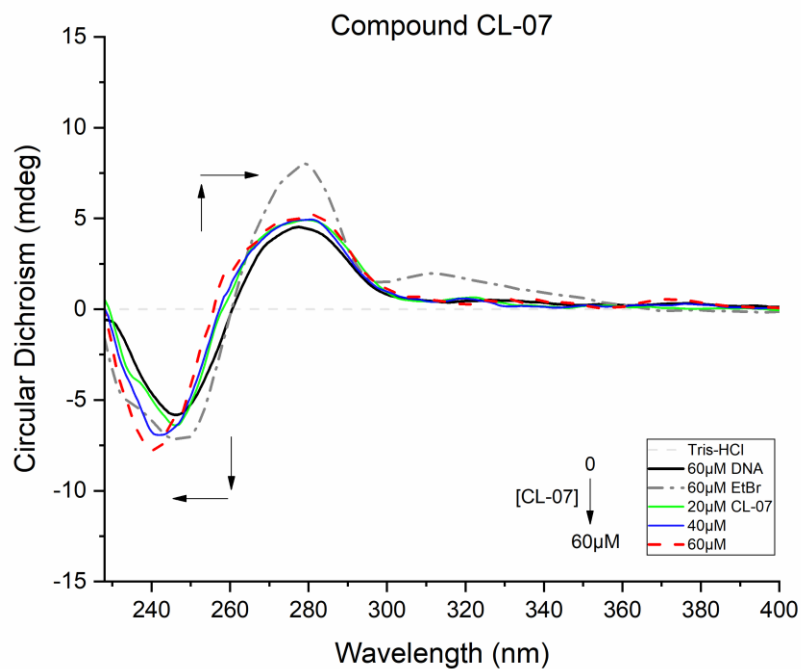

**Figure S55.** Circular dichroism of DNA at a concentration of 60  $\mu$ mol L<sup>-1</sup> in Tris-HCl buffer (pH 7.4), in the presence of increasing concentrations of **CL-07** (20, 40 and 60  $\mu$ mol L<sup>-1</sup>).

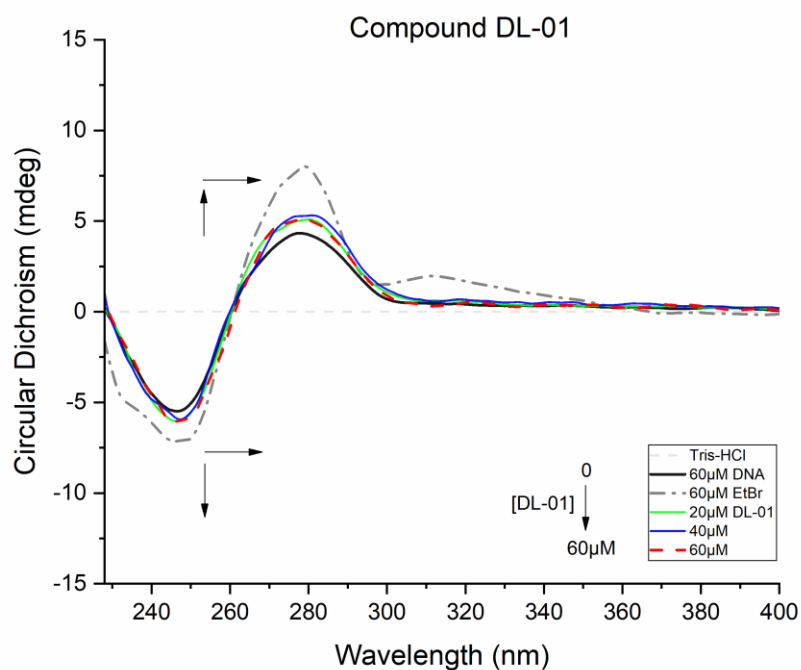

**Figure S56.** Circular dichroism of DNA at a concentration of 60  $\mu$ mol L<sup>-1</sup> in Tris-HCl buffer (pH 7.4), in the presence of increasing concentrations of **DL-01** (20, 40 and 60  $\mu$ mol L<sup>-1</sup>).

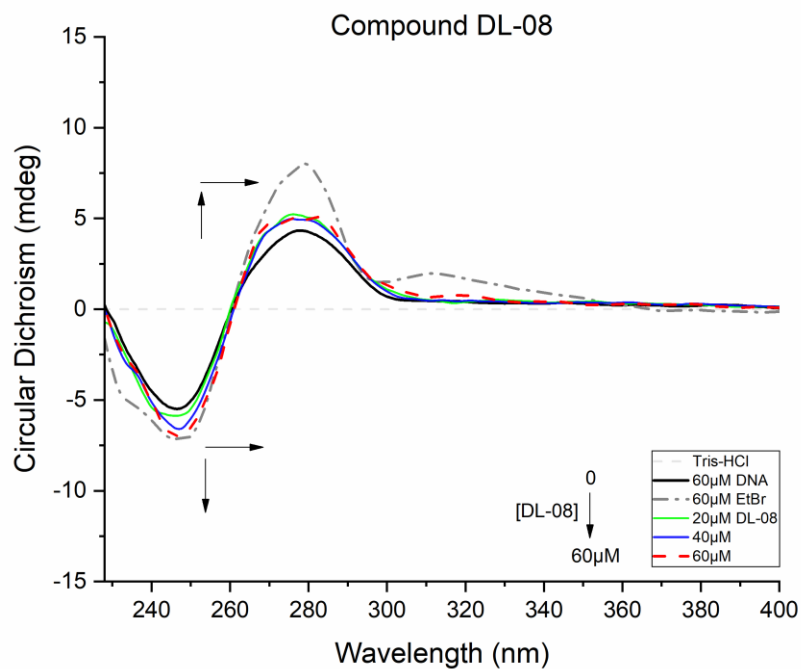

**Figure S57.** Circular dichroism of DNA at a concentration of 60  $\mu\text{mol L}^{-1}$  in Tris-HCl buffer (pH 7.4), in the presence of increasing concentrations of **DL-08** (20, 40 and 60  $\mu\text{mol L}^{-1}$ ).

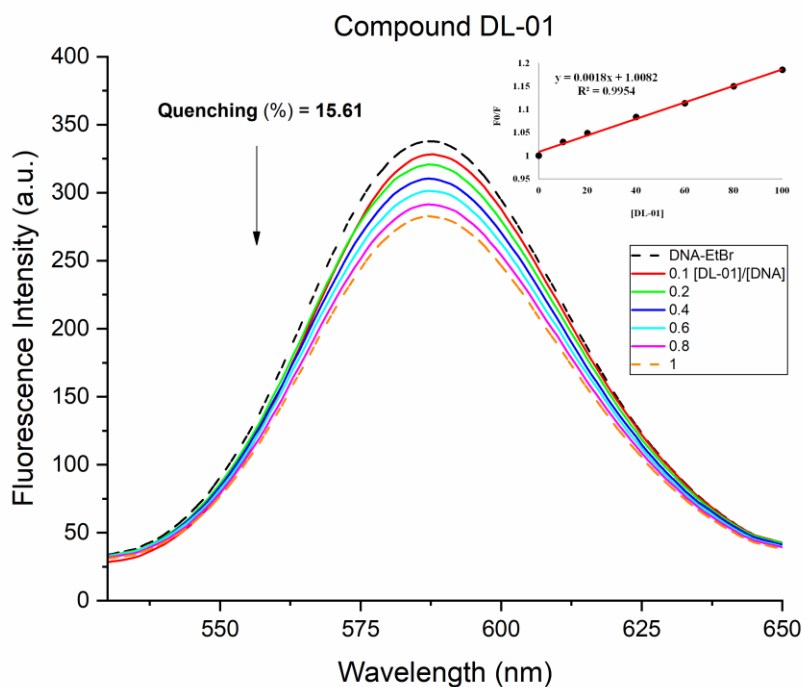

**Figure S58.** Emission quenching curves of EtBr-DNA by compound **DL-01** ( $[\text{EtBr}] = 20 \mu\text{mol L}^{-1}$ ,  $[\text{DNA}] = 100 \mu\text{mol L}^{-1}$ ,  $[\text{DL-01}] = 0 - 100 \mu\text{mol L}^{-1}$  ( $\lambda_{\text{ex}} = 520 \text{ nm}$ )).

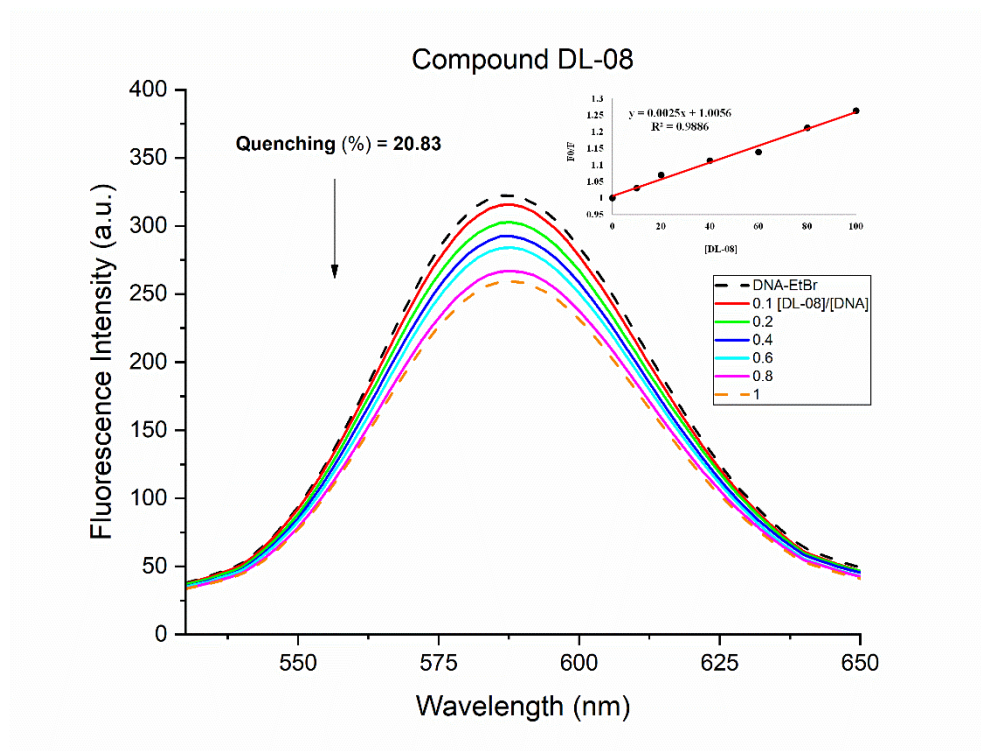

**Figure S59.** Emission quenching curves of EtBr-DNA by compound **DL-08** ( $[\text{EtBr}] = 20 \mu\text{mol L}^{-1}$ ,  $[\text{DNA}] = 100 \mu\text{mol L}^{-1}$ ,  $[\text{DL-01}] = 0 - 100 \mu\text{mol L}^{-1}$  ( $\lambda_{\text{ex}} = 520 \text{ nm}$ )).

**Table S1.** Absolute and relative organ mass from animals treated with acridine derivatives after an acute toxicity study.

| Organ mass    | Liver (g)                | Lungs (g)                | Speleen (g)              | Heart (g)                | Kidneys (g)              |
|---------------|--------------------------|--------------------------|--------------------------|--------------------------|--------------------------|
| <b>CL-07</b>  | 6,135±0,287 <sup>a</sup> | 0,619±0,089 <sup>b</sup> | 0,574±0,061 <sup>c</sup> | 0,417±0,038 <sup>d</sup> | 1,308±0,099 <sup>e</sup> |
| <b>DL-01</b>  | 5,257±0,610 <sup>a</sup> | 0,640±0,057 <sup>b</sup> | 0,551±0,037 <sup>c</sup> | 0,410±0,039 <sup>d</sup> | 1,338±0,091 <sup>e</sup> |
| <b>DL -08</b> | 5,619±0,259 <sup>a</sup> | 0,646±0,032 <sup>b</sup> | 0,412±0,033 <sup>c</sup> | 0,427±0,035 <sup>d</sup> | 1,355±0,062 <sup>e</sup> |
| <b>NC</b>     | 4,959±0,191 <sup>a</sup> | 0,628±0,027 <sup>b</sup> | 0,408±0,037 <sup>c</sup> | 0,409±0,040 <sup>d</sup> | 1,284±0,040 <sup>e</sup> |

(NC) Control vehicle. In the same category and treatment, the means followed by unequal letters, differ statistically from each other by the Student's T test ( $p < 0.05$ ), in relation to the treated and control groups.

**Table S2.** Feed, water consumption and weight gain in animals treated with compounds during acute toxicity study.

| Physiological data | Food (g/day)            | Water (mL/day)          | Weight gain (g)        |
|--------------------|-------------------------|-------------------------|------------------------|
| <b>CL-07</b>       | 14,57±1,78 <sup>a</sup> | 23,57±1,34 <sup>c</sup> | 1,33±0,27 <sup>e</sup> |
| <b>DL-01</b>       | 12,35±1,39 <sup>b</sup> | 23,71±1,26 <sup>c</sup> | 0,69±0,58 <sup>f</sup> |
| <b>DL -08</b>      | 15,21±0,97 <sup>a</sup> | 25,28±0,46 <sup>d</sup> | 0,76±0,43 <sup>f</sup> |
| <b>NC</b>          | 18,64±3,52 <sup>a</sup> | 23,14±1,51 <sup>c</sup> | 1,00±0 <sup>f</sup>    |

(NC) Control vehicle. In the same category and treatment, the means followed by unequal letters, differ statistically from each other by the Student's T test ( $p < 0.05$ ), in relation to the treated and control groups.
